# Supplementary material for: The Complete Genome of Propionibacterium freudenreichii CIRM-BIA1T, a Hardy Actinobacterium with Food and Probiotic Applications
Source: PLOS journal article supplement (doi:10.1371/journal.pone.0011748), 2010-07-23
Supplement: S2 (10.1371/journal.pone.0011748.s002) [file journal.pone.0011748.s002]

| IS Name          | Family name (sub-group) | N° of complete copies | N° of partial copies |
|------------------|-------------------------|-----------------------|----------------------|
| IS <i>Pfr</i> 1  | IS <i>L3</i>            | 10                    | 0                    |
| IS <i>Pfr</i> 2  | IS <i>L3</i>            | 1                     | 0                    |
| IS <i>Pfr</i> 3  | IS <i>L3</i>            | 4                     | 2                    |
| IS <i>Pfr</i> 4  | IS <i>L3</i>            | 1                     | 0                    |
| IS <i>Pfr</i> 5  | IS <i>481</i>           | 2                     | 0                    |
| IS <i>Pfr</i> 6  | IS <i>L3</i>            | 3                     | 0                    |
| IS <i>Pfr</i> 7  | IS <i>L3</i>            | 1                     | 0                    |
| IS <i>Pfr</i> 8  | IS <i>L3</i>            | 3                     | 0                    |
| IS <i>Pfr</i> 9  | IS <i>30</i>            | 2                     | 0                    |
| IS <i>Pfr</i> 10 | IS3 (IS <i>407</i> )    | 8                     | 1                    |
| IS <i>Pfr</i> 11 | IS3 (IS3)               | 5                     | 0                    |
| IS <i>Pfr</i> 12 | IS3 (IS <i>51</i> )     | 6                     | 0                    |
| IS <i>Pfr</i> 13 | IS3 (IS <i>51</i> )     | 1                     | 0                    |
| IS <i>Pfr</i> 14 | IS <i>30</i>            | 1                     | 0                    |
| IS <i>Pfr</i> 15 | IS <i>481</i>           | 2                     | 0                    |
| IS <i>Pfr</i> 16 | IS <i>30</i>            | 1                     | 0                    |
| IS <i>Pfr</i> 17 | IS <i>481</i>           | 1                     | 1                    |
| IS <i>Pfr</i> 18 | IS <i>L3</i>            | 1                     | 0                    |
| IS <i>Pfr</i> 19 | IS <i>481</i>           | 2                     | 1                    |
| IS <i>Pfr</i> 20 | IS <i>L3</i>            | 1                     | 5                    |
| IS <i>Pfr</i> 21 | IS <i>481</i>           | 1                     | 0                    |
