# Supplementary material for: The Complete Genome of Propionibacterium freudenreichii CIRM-BIA1T, a Hardy Actinobacterium with Food and Probiotic Applications
Source: PLoS One. 2010 Jul 23;5(7):e11748. doi: 10.1371/journal.pone.0011748 (PMC2909200; doi:10.1371/journal.pone.0011748)
Supplement: Table S3 — Bidirectional best hits results between P. freudenreichii proteins and P. acnes proteins. No P. acnes protein putatively involved in the degradation of host molecules or in the mediation of inflammation was found in P. freudenreichii. (0.15 MB PDF) [file pone.0011748.s003.pdf]

| locus tag on <i>P. freudenreichii</i> | gene name on <i>P. freudenreichii</i> | product                                                                                                                                                                                                     | locus tag on <i>P. acnes</i> | SurfG+ prediction |
|---------------------------------------|---------------------------------------|-------------------------------------------------------------------------------------------------------------------------------------------------------------------------------------------------------------|------------------------------|-------------------|
| PFREUD_00010                          | dnaA                                  | Chromosomal replication initiator protein                                                                                                                                                                   | PPA0001                      | CYT               |
| PFREUD_00090                          | recF                                  | DNA replication and repair protein recF                                                                                                                                                                     | PPA0004                      | CYT               |
| PFREUD_00150                          | gyrB2                                 | DNA gyrase subunit B                                                                                                                                                                                        | PPA0009                      | CYT               |
| PFREUD_00160                          | gyrA                                  | DNA gyrase subunit A                                                                                                                                                                                        | PPA0010                      | CYT               |
| PFREUD_00170                          |                                       | Hypothetical protein                                                                                                                                                                                        | PPA1806                      | CYT               |
| PFREUD_00290                          | iol                                   | myo-inositol 2-dehydrogenase                                                                                                                                                                                | PPA0466                      | CYT               |
| PFREUD_00370                          | ald                                   | Alanine dehydrogenase                                                                                                                                                                                       | PPA2274                      | CYT               |
| PFREUD_00390                          |                                       | ErfK/YbiS/YcfS/YnhG precursor                                                                                                                                                                               | PPA2270                      | CYT               |
| PFREUD_00410                          |                                       | Hypothetical protein                                                                                                                                                                                        | PPA1095                      | CYT               |
| PFREUD_00470                          | rmIA (rfbA)                           | Glucose-1-phosphate thymidyltransferase                                                                                                                                                                     | PPA2288                      | CYT               |
| PFREUD_00670                          |                                       | 1-acyl-sn-glycerol-3-phosphate acyltransferase                                                                                                                                                              | PPA2237                      | CYT               |
| PFREUD_00680                          |                                       | dehydrogenase                                                                                                                                                                                               | PPA2236                      | CYT               |
| PFREUD_00770                          | gpsA                                  | Glycerol-3-phosphate dehydrogenase [NAD(P)+] (NAD(P)H- dependent glycerol-3-phosphate dehydrogenase)                                                                                                        | PPA2315                      | CYT               |
| PFREUD_00820                          |                                       | two-component response regulator                                                                                                                                                                            | PPA2112                      | CYT               |
| PFREUD_00840                          | ptpA                                  | Low molecular weight protein-tyrosine- phosphatase (protein-tyrosine-phosphatase)                                                                                                                           | PPA2110                      | CYT               |
| PFREUD_00860                          | argF                                  | Ornithine carbamoyltransferase                                                                                                                                                                              | PPA0584                      | CYT               |
| PFREUD_01060                          | aatB                                  | Leucyl/phenylalanyl-tRNA-protein transferase                                                                                                                                                                | PPA2221                      | CYT               |
| PFREUD_01100                          |                                       | Hypothetical protein                                                                                                                                                                                        | PPA2088                      | CYT               |
| PFREUD_01130                          | alr                                   | Alanine racemase                                                                                                                                                                                            | PPA2285                      | CYT               |
| PFREUD_01350                          | serS1                                 | Seryl-tRNA synthetase                                                                                                                                                                                       | PPA2219                      | CYT               |
| PFREUD_01430                          | tpx                                   | thiol peroxidase                                                                                                                                                                                            | PPA0590                      | CYT               |
| PFREUD_01440                          | npdA                                  | Silent information regulator protein Sir2 /NAD- dependent deacetylase                                                                                                                                       | PPA2172                      | CYT               |
| PFREUD_01460                          | argG                                  | Argininosuccinate synthase                                                                                                                                                                                  | PPA2201                      | CYT               |
| PFREUD_01470                          |                                       | NADPH:quinone reductase and related Zn-dependent oxidoreductases                                                                                                                                            | PPA2200                      | CYT               |
| PFREUD_01560                          |                                       | Short chain dehydrogenase                                                                                                                                                                                   | PPA1711                      | CYT               |
| PFREUD_01580                          | aroE                                  | Shikimate 5-dehydrogenase                                                                                                                                                                                   | PPA1181                      | CYT               |
| PFREUD_01630                          |                                       | two-component response regulator LuxR                                                                                                                                                                       | PPA2028                      | CYT               |
| PFREUD_01690                          | fkbp                                  | FK506-binding protein (peptidyl-prolyl cis-trans isomerase)                                                                                                                                                 | PPA2163                      | CYT               |
| PFREUD_01810                          |                                       | Hypothetical protein                                                                                                                                                                                        | PPA0164                      | CYT               |
| PFREUD_01830                          |                                       | FAD-dependent pyridine nucleotide-disulphide oxidoreductase:4Fe-4S ferredoxin, iron-sulfur binding:Aromatic ring hydroxylase                                                                                | PPA0163                      | CYT               |
| PFREUD_01840                          | nifJ1                                 | Pyruvate synthase/Pyruvate-flavodoxin oxidoreductase                                                                                                                                                        | PPA0162                      | CYT               |
| PFREUD_01850                          |                                       | Dihydroorotate dehydrogenase                                                                                                                                                                                | PPA0161                      | CYT               |
| PFREUD_02140                          |                                       | Hypothetical protein                                                                                                                                                                                        | PPA1479                      | CYT               |
| PFREUD_02170                          | lysS                                  | Lysyl-tRNA synthetase                                                                                                                                                                                       | PPA0181                      | CYT               |
| PFREUD_02190                          | bkdA1                                 | 2-oxoisovalerate dehydrogenase subunit alpha (Branched- chain alpha-keto acid dehydrogenase E1 component alpha chain) (BCKDH E1-alpha)                                                                      | PPA2094                      | CYT               |
| PFREUD_02200                          | bkdA2                                 | 2-oxoisovalerate dehydrogenase subunit beta (EC 1.2.4.4) (Branched- chain alpha-keto acid dehydrogenase E1 component beta chain) (BCKDH E1-beta) Pyruvate dehydrogenase E1 component subunit beta           | PPA2093                      | CYT               |
| PFREUD_02210                          | bkdB                                  | dihydrolipoyllysine-residue (2- methylpropanoyl)transferase. Lipamide acyltransferase component of branched-chain alpha-keto acid dehydrogenase complex (E2) (Dihydrolipoamide branched chain transacylase) | PPA2092                      | CYT               |
| PFREUD_02220                          |                                       | Hypothetical protein                                                                                                                                                                                        | PPA1999                      | CYT               |
| PFREUD_02240                          |                                       | Hypothetical protein                                                                                                                                                                                        | PPA0183                      | CYT               |
| PFREUD_02270                          |                                       | Hypothetical protein                                                                                                                                                                                        | PPA0120                      | CYT               |
| PFREUD_02290                          |                                       | Hypothetical secreted protein                                                                                                                                                                               | PPA2334                      | CYT               |
| PFREUD_02370                          | lacZ                                  | Beta-galactosidase (Lactase) LacZ                                                                                                                                                                           | PPA1700                      | CYT               |
| PFREUD_02390                          |                                       | Transcriptional regulator                                                                                                                                                                                   | PPA1140                      | CYT               |
| PFREUD_02420                          | caiA                                  | Crotonobetainyl-CoA dehydrogenase (Crotonobetainyl-CoA reductase)                                                                                                                                           | PPA2216                      | CYT               |
| PFREUD_02480                          | fixA (ydiQ)                           | Electron transfer flavoprotein (FixA protein)                                                                                                                                                               | PPA2214                      | CYT               |
| PFREUD_02490                          | fixB (ydiR)                           | Electron transfer flavoprotein, carnitine metabolism (FixB protein)                                                                                                                                         | PPA2213                      | CYT               |
| PFREUD_02500                          | fixC (ydiS)                           | Electron transfer flavoprotein-quinone oxidoreductase (FixC protein)                                                                                                                                        | PPA2212                      | CYT               |
| PFREUD_02520                          |                                       | DNA or RNA helicase                                                                                                                                                                                         | PPA0896                      | CYT               |
| PFREUD_02540                          | udgA (rkpK)                           | UDP-glucose 6-dehydrogenase                                                                                                                                                                                 | PPA0593                      | CYT               |
| PFREUD_02550                          | argS                                  | Arginyl-tRNA synthetase (Arginine--tRNA ligase) (ArgRS)                                                                                                                                                     | PPA2128                      | CYT               |
| PFREUD_02560                          | fepC3                                 | FepC                                                                                                                                                                                                        | PPA0792                      | CYT               |
| PFREUD_02870                          | dps                                   | Starvation-inducible DNA-binding protein                                                                                                                                                                    | PPA2134                      | CYT               |
| PFREUD_03030                          |                                       | Hypothetical protein                                                                                                                                                                                        | PPA0424                      | CYT               |
| PFREUD_03100                          | kduD                                  | 2-deoxy-D-gluconate 3-dehydrogenase                                                                                                                                                                         | PPA0372                      | CYT               |
| PFREUD_03110                          | cat                                   | Coenzyme A transferase (Putative succinyl-CoA or butyryl-CoA:coenzyme A transferase)                                                                                                                        | PPA2053                      | CYT               |
| PFREUD_03160                          | PF2369                                | Putative aldo/keto reductase (oxidoreductase)                                                                                                                                                               | PPA2129                      | CYT               |
| PFREUD_03180                          | rsmC                                  | rRNA (guanine-N2-)-methyltransferase                                                                                                                                                                        | PPA2050                      | CYT               |
| PFREUD_03210                          |                                       | Hypothetical protein                                                                                                                                                                                        | PPA2049                      | CYT               |
| PFREUD_03230                          | ppdk                                  | Pyruvate phosphate dikinase                                                                                                                                                                                 | PPA2048                      | CYT               |
| PFREUD_03250                          | rbsK                                  | carbohydrate or pyrimidine kinases PfkB family                                                                                                                                                              | PPA0018                      | CYT               |
| PFREUD_03270                          |                                       | two component system response regulator                                                                                                                                                                     | PPA2043                      | CYT               |
| PFREUD_03290                          | metN                                  | Methionine import ATP-binding protein metN                                                                                                                                                                  | PPA1759                      | CYT               |
| PFREUD_03380                          | thiM                                  | Hydroxyethylthiazole kinase                                                                                                                                                                                 | PPA0885                      | CYT               |
| PFREUD_03610                          |                                       | Zinc-containing alcohol dehydrogenase                                                                                                                                                                       | PPA2245                      | CYT               |
| PFREUD_03760                          |                                       | Hemerythrin HHE cation binding region                                                                                                                                                                       | PPA0240                      | CYT               |
| PFREUD_03830                          |                                       | Hypothetical protein                                                                                                                                                                                        | PPA0205                      | CYT               |
| PFREUD_03840                          | recR                                  | Recombination protein recR                                                                                                                                                                                  | PPA0206                      | CYT               |
| PFREUD_03860                          | ileS                                  | Isoleucyl-tRNA synthetase (Isoleucine--tRNA ligase)                                                                                                                                                         | PPA0216                      | CYT               |
| PFREUD_03870                          |                                       | oxidoreductase                                                                                                                                                                                              | PPA0219                      | CYT               |
| PFREUD_03880                          | ask                                   | Aspartokinase (Aspartate kinase)                                                                                                                                                                            | PPA2148                      | CYT               |
| PFREUD_04000                          | purD                                  | Phosphoribosylamine-glycine ligase                                                                                                                                                                          | PPA1993                      | CYT               |
| PFREUD_04010                          | purB                                  | Adenylosuccinate lyase                                                                                                                                                                                      | PPA1992                      | CYT               |
| PFREUD_04050                          | purL/purQ                             | Phosphoribosylformylglycinamidase synthase 1 (Phosphoribosylformylglycinamidase synthase I) (FGAM synthase I)                                                                                               | PPA1987                      | CYT               |
| PFREUD_04250                          | pepB                                  | Phosphatidylethanolamine-binding protein                                                                                                                                                                    | PPA2138                      | CYT               |
| PFREUD_04260                          |                                       | DeaD/DeaH box helicase                                                                                                                                                                                      | PPA2135                      | CYT               |
| PFREUD_04270                          | eda, hga, kdga                        | 2-dehydro-3-deoxyphosphogluconate aldolase/4- hydroxy-2-oxoglutarate aldolase                                                                                                                               | PPA2133                      | CYT               |
| PFREUD_04290                          | pgl, PPA2131                          | Glucose-6-phosphate isomerase (EC 5.3.1.9) (GPI) (Phosphoglucose isomerase) (PGI) (Phosphohexose isomerase) (PHI)                                                                                           | PPA2131                      | CYT               |
| PFREUD_04320                          | Arth_4141                             | FAD linked oxidase domain protein                                                                                                                                                                           | PPA0775                      | CYT               |
| PFREUD_04430                          |                                       | Thiamine pyrophosphate enzyme                                                                                                                                                                               | PPA1468                      | CYT               |
| PFREUD_04540                          | hrpA1                                 | ATP-dependent helicase HrpA                                                                                                                                                                                 | PPA0155                      | CYT               |
| PFREUD_04550                          | cobA                                  | CobA Uroporphyrinogen III methyltransferase                                                                                                                                                                 | PPA0439                      | CYT               |
| PFREUD_04560                          | cblO1                                 | Cobalt import ATP-binding protein CblO                                                                                                                                                                      | PPA0434                      | CYT               |

|              |             |                                                                                                                                                   |         |     |
|--------------|-------------|---------------------------------------------------------------------------------------------------------------------------------------------------|---------|-----|
| PFREUD_04600 | gntR        | transcription factor (transcription regulation)                                                                                                   | PPA0740 | CYT |
| PFREUD_04650 | dnaJ2       | Chaperone protein dnaJ 2 (DnaJ2 protein) (Heat shock protein 40 2)                                                                                | PPA2038 | CYT |
| PFREUD_04660 | hspr2       | Heat shock protein transcriptional repressor Hspr2 (Hspr2 protein)                                                                                | PPA2037 | CYT |
| PFREUD_04670 |             | BadF/BadG/BcrA/BcrD ATPase family protein                                                                                                         | PPA1986 | CYT |
| PFREUD_04680 | purL        | Phosphoribosylformylglycinamide synthase II (FGAM synthase II)                                                                                    | PPA1977 | CYT |
| PFREUD_04690 |             | Zinc metalloproteinase                                                                                                                            | PPA1972 | CYT |
| PFREUD_04720 | fhs         | Formate--tetrahydrofolate ligase                                                                                                                  | PPA0049 | CYT |
| PFREUD_04770 | purF        | Amidophosphoribosyltransferase                                                                                                                    | PPA1970 | CYT |
| PFREUD_04780 | purM        | Phosphoribosylformylglycinamide cyclo-ligase                                                                                                      | PPA1969 | CYT |
| PFREUD_04810 | pf962       | Carboxylic ester hydrolase                                                                                                                        | PPA1967 | CYT |
| PFREUD_05030 |             | Deoxycytidylate deaminase (dCMP deaminase)                                                                                                        | PPA1950 | CYT |
| PFREUD_05090 |             | nuclease (RecB family)                                                                                                                            | PPA1944 | CYT |
| PFREUD_05110 |             | ABC transporter ATP-binding protein                                                                                                               | PPA1942 | CYT |
| PFREUD_05130 | dhbC        | Menaquinone-specific isochorismate synthase                                                                                                       | PPA1940 | CYT |
| PFREUD_05140 |             | electron transfer oxidoreductase                                                                                                                  | PPA1938 | CYT |
| PFREUD_05170 | nuoB        | NADH-quinone oxidoreductase chain B                                                                                                               | PPA1935 | CYT |
| PFREUD_05180 | nuoC        | NADH-quinone oxidoreductase chain C (NADH dehydrogenase I, chain C)                                                                               | PPA1934 | CYT |
| PFREUD_05190 | nuoD        | NADH-quinone oxidoreductase chain D (EC 1.6.99.5) (NADH dehydrogenase I, chain D)                                                                 | PPA1933 | CYT |
| PFREUD_05200 | nuoE        | NADH-quinone oxidoreductase chain E                                                                                                               | PPA1932 | CYT |
| PFREUD_05210 | nuoF        | NADH-quinone oxidoreductase chain F (NADH dehydrogenase I, chain F) (NDH-1, chain F)                                                              | PPA1931 | CYT |
| PFREUD_05220 | nuoG        | NADH-quinone oxidoreductase chain G (NADH dehydrogenase I, chain G)                                                                               | PPA1930 | CYT |
| PFREUD_05240 | nuoI        | NADH-quinone oxidoreductase subunit I (NADH dehydrogenase I subunit I) (NDH-1 subunit I)                                                          | PPA1928 | CYT |
| PFREUD_05300 | idsA        | Heptaprenyl diphosphate synthase component II                                                                                                     | PPA1921 | CYT |
| PFREUD_05330 |             | Metalloprotease (Peptidase family M13)                                                                                                            | PPA1909 | CYT |
| PFREUD_05340 |             | Thiamine pyrophosphate (TPP family)                                                                                                               | PPA1905 | CYT |
| PFREUD_05350 |             | Pyruvate flavodoxin/ferredoxin oxidoreductase                                                                                                     | PPA1904 | CYT |
| PFREUD_05380 | xthA        | Exodeoxyribonuclease III/exonuclease III                                                                                                          | PPA1898 | CYT |
| PFREUD_05410 | ahpC        | Peroxiredoxin/Alkyl hydroperoxide reductase subunit C /Thioredoxin peroxidase/Alkyl hydroperoxide reductase protein C22/General stress protein 22 | PPA1989 | CYT |
| PFREUD_05420 | ahpF        | Alkyl hydroperoxide reductase subunit F                                                                                                           | PPA1990 | CYT |
| PFREUD_05450 | rpmG        | 50S ribosomal protein L33 RpmG                                                                                                                    | PPA1897 | CYT |
| PFREUD_05460 |             | R_hydratase_like, (R)-hydratase [(R)-specific enoyl-CoA hydratase].                                                                               | PPA1896 | CYT |
| PFREUD_05470 |             | R_hydratase_like, (R)-hydratase [(R)-specific enoyl-CoA hydratase]                                                                                | PPA1895 | CYT |
| PFREUD_05480 | murB        | UDP-N-acetylenolpyruvoylglucosamine reductase (UDP-N- acetylmuramate dehydrogenase)                                                               | PPA1894 | CYT |
| PFREUD_05520 | nusG        | Transcription antitermination protein NusG                                                                                                        | PPA1891 | CYT |
| PFREUD_05530 | rplK        | 50S ribosomal protein L11                                                                                                                         | PPA1890 | CYT |
| PFREUD_05540 | rplA        | 50S ribosomal protein L1                                                                                                                          | PPA1889 | CYT |
| PFREUD_05550 | lipB        | Lipoyltransferase (Lipoyl-[acyl-carrier-protein]- protein- N-lipoyltransferase) (Lipoate-protein ligase B)                                        | PPA0692 | CYT |
| PFREUD_05560 | lipA        | Lipoic acid synthetase                                                                                                                            | PPA0689 | CYT |
| PFREUD_05570 | rplJ        | 50S ribosomal protein L10                                                                                                                         | PPA1887 | CYT |
| PFREUD_05580 | rplL        | 50S ribosomal protein L7/L12                                                                                                                      | PPA1885 | CYT |
| PFREUD_05600 | rpoB        | DNA-directed RNA polymerase beta chain (RNAP beta subunit) (Transcriptase beta chain) (RNA polymerase subunit beta)                               | PPA1884 | CYT |
| PFREUD_05610 | rpoC        | DNA-directed RNA polymerase beta chain (RNAP beta subunit) (Transcriptase beta chain) (RNA polymerase beta subunit)                               | PPA1883 | CYT |
| PFREUD_05620 | rpsL        | 30S ribosomal protein S12                                                                                                                         | PPA1878 | CYT |
| PFREUD_05630 | rpsG        | 30S ribosomal protein S7                                                                                                                          | PPA1876 | CYT |
| PFREUD_05640 | fusA        | Elongation factor G (EF-G)                                                                                                                        | PPA1875 | CYT |
| PFREUD_05650 | tuf         | Elongation factor Tu                                                                                                                              | PPA1873 | CYT |
| PFREUD_05680 | glxX        | Glutamyl-tRNA synthetase (Glutamate--tRNA ligase) (GluRS)                                                                                         | PPA1869 | CYT |
| PFREUD_05690 | pabC        | Branched-chain amino acid aminotransferase/aminodeoxychorismate lyase                                                                             | PPA2261 | CYT |
| PFREUD_05700 | rpsJ        | 30S ribosomal protein S10                                                                                                                         | PPA1865 | CYT |
| PFREUD_05710 | rplC        | 50S ribosomal protein L3                                                                                                                          | PPA1863 | CYT |
| PFREUD_05730 | rplW        | 50S ribosomal protein L23                                                                                                                         | PPA1861 | CYT |
| PFREUD_05740 | rplB        | 50S ribosomal protein L2                                                                                                                          | PPA1860 | CYT |
| PFREUD_05750 | rpsS        | 30S ribosomal protein S19                                                                                                                         | PPA1859 | CYT |
| PFREUD_05780 | rplP        | 50S ribosomal protein L16                                                                                                                         | PPA1856 | CYT |
| PFREUD_05790 | rpmC        | 50S ribosomal protein L29                                                                                                                         | PPA1855 | CYT |
| PFREUD_05800 | rpsQ        | 30S ribosomal protein S17                                                                                                                         | PPA1853 | CYT |
| PFREUD_05810 | rplN        | 50S ribosomal protein L14                                                                                                                         | PPA1852 | CYT |
| PFREUD_05820 | rplX        | 50S ribosomal protein L24                                                                                                                         | PPA1851 | CYT |
| PFREUD_05830 | rplE        | 50S ribosomal protein L5                                                                                                                          | PPA1850 | CYT |
| PFREUD_05840 | rpsN1, rpsZ | 30S ribosomal protein S14 type Z                                                                                                                  | PPA1849 | CYT |
| PFREUD_05850 | rpsH        | 30S ribosomal protein S8                                                                                                                          | PPA1848 | CYT |
| PFREUD_05860 | rplF        | 50S ribosomal protein L6                                                                                                                          | PPA1846 | CYT |
| PFREUD_05870 | rplR        | Ribosomal protein L18                                                                                                                             | PPA1845 | CYT |
| PFREUD_05890 | rpmD        | 50S ribosomal protein L30                                                                                                                         | PPA1843 | CYT |
| PFREUD_05900 | rplO        | 50S ribosomal protein L15                                                                                                                         | PPA1842 | CYT |
| PFREUD_05940 |             | ABC transporter, ATPase subunit                                                                                                                   | PPA2066 | CYT |
| PFREUD_05980 | adk         | Adenylate kinase (EC 2.7.4.3) (ATP-AMP transphosphorylase)                                                                                        | PPA1834 | CYT |
| PFREUD_05990 | map         | Methionine aminopeptidase (MAP) (Peptidase M)                                                                                                     | PPA1833 | CYT |
| PFREUD_06010 |             | Hypothetical protein                                                                                                                              | PPA2117 | CYT |
| PFREUD_06020 | infA        | Translation initiation factor IF-1                                                                                                                | PPA1832 | CYT |
| PFREUD_06030 |             | Hypothetical protein                                                                                                                              | PPA1831 | CYT |
| PFREUD_06040 | rpsM        | 30S ribosomal protein S13                                                                                                                         | PPA1829 | CYT |
| PFREUD_06050 | rpsK        | 30S ribosomal protein S11                                                                                                                         | PPA1828 | CYT |
| PFREUD_06060 | rpsD        | 30S ribosomal protein S4                                                                                                                          | PPA1827 | CYT |
| PFREUD_06070 | rpoA        | DNA-directed RNA polymerase alpha chain (RNAP alpha subunit) (Transcriptase alpha chain) (RNA polymerase subunit alpha)                           | PPA1826 | CYT |
| PFREUD_06090 | gtfE        | Glycosyltransferase                                                                                                                               | PPA1824 | CYT |
| PFREUD_06110 | sodA        | Iron/Manganese superoxide dismutase (Superoxide dismutase [Mn/Fe]) (SODM)                                                                         | PPA1818 | CYT |
| PFREUD_06120 |             | ABC transporter ATP-binding protein                                                                                                               | PPA1817 | CYT |
| PFREUD_06150 | cbiO2       | ABC transporter, ATP-binding protein, cobalt                                                                                                      | PPA1813 | CYT |
| PFREUD_06190 |             | methyltransferase                                                                                                                                 | PPA1810 | CYT |
| PFREUD_06200 | truA        | tRNA pseudouridine synthase A (tRNA-uridine isomerase I) (tRNA pseudouridylate synthase I)                                                        | PPA1809 | CYT |
| PFREUD_06240 | rplM        | 50S ribosomal protein L13                                                                                                                         | PPA1803 | CYT |
| PFREUD_06250 | rspl        | 30S ribosomal protein S9                                                                                                                          | PPA1802 | CYT |
| PFREUD_06260 | glmM        | Phosphoglucosamine mutase                                                                                                                         | PPA1801 | CYT |
| PFREUD_06270 | coaA        | Pantothenate kinase (Pantothenic acid kinase)                                                                                                     | PPA1799 | CYT |
| PFREUD_06280 | glmS        | Glucosamine--fructose-6-phosphate aminotransferase ( Hexosephosphate aminotransferase, D- fructose-6-phosphate amidotransferase)                  | PPA1794 | CYT |
| PFREUD_06300 |             | Carbohydrate kinase                                                                                                                               | PPA1792 | CYT |
| PFREUD_06310 | sqdX (rfaG) | Glycosyltransferase                                                                                                                               | PPA1791 | CYT |

|              |                       |                                                                                                                                                         |         |     |
|--------------|-----------------------|---------------------------------------------------------------------------------------------------------------------------------------------------------|---------|-----|
| PFREUD_06340 |                       | Peptidase, family M22                                                                                                                                   | PPA1784 | CYT |
| PFREUD_06350 | rimI                  | Ribosomal-protein-alanine acetyltransferase                                                                                                             | PPA1783 | CYT |
| PFREUD_06360 | gcp                   | Putative O-sialoglycoprotein endopeptidase                                                                                                              | PPA1782 | CYT |
| PFREUD_06370 | bluB/cobT2            | Phosphoribosyltransferase/nitroreductase (fusion gene) (Nicotinate-nucleotide-dimethylbenzimidazole phosphoribosyltransferase)                          | PPA0953 | CYT |
| PFREUD_06390 | mutT                  | ,8-dihydro-8-oxoguanine-triphosphatase (Mutator MutT protein/7,8-dihydro-8-oxoguanine-triphosphatase)                                                   | PPA1781 | CYT |
| PFREUD_06410 |                       | Hypothetical protein                                                                                                                                    | PPA1776 | CYT |
| PFREUD_06460 | groS1(groES1) (hsp10) | 10 kDa chaperonin 1 (Protein Cpn10 1) (groES protein 1) (Heat shock 10 1)                                                                               | PPA1773 | CYT |
| PFREUD_06470 | groL1 (groEL1)        | 60 kDa chaperonin 1 (Protein Cpn60 1) (groEL protein 1) (Heat shock protein 60 1)                                                                       | PPA1772 | CYT |
| PFREUD_06480 | guaB1                 | Inosine-5'-monophosphate dehydrogenase (IMP dehydrogenase) (IMPDH) (IMPD) / GMP reductase                                                               | PPA1768 | CYT |
| PFREUD_06490 | guaB2                 | Inosine-5'-monophosphate dehydrogenase (IMP dehydrogenase) (IMPDH) (IMPD) / GMP reductase                                                               | PPA1767 | CYT |
| PFREUD_06550 | cysE                  | Serine acetyltransferase                                                                                                                                | PPA1765 | CYT |
| PFREUD_06560 | cys1                  | Cysteine synthase 1                                                                                                                                     | PPA0963 | CYT |
| PFREUD_06590 | araD1                 | L-ribulose-5-phosphate 4-epimerase                                                                                                                      | PPA0882 | CYT |
| PFREUD_06620 | lacI1                 | arabinose operon repressor                                                                                                                              | PPA0088 | CYT |
| PFREUD_06640 |                       | ATP binding protein of ABC transporter , ATPase component                                                                                               | PPA0015 | CYT |
| PFREUD_06680 | guaA                  | GMP synthase [glutamine-hydrolyzing] (Glutamine amidotransferase) (GMP synthetase)                                                                      | PPA1764 | CYT |
| PFREUD_06800 | pcrA                  | ATP-dependent DNA helicase                                                                                                                              | PPA1756 | CYT |
| PFREUD_06820 | purN                  | 5-phosphoribosylglycinamide formyltransferase (phosphoribosylglycinamide formyltransferase)                                                             | PPA1748 | CYT |
| PFREUD_06830 | purH                  | Phosphoribosylaminoimidazolecarboxamide formyltransferase (AICAR transformylase)                                                                        | PPA1747 | CYT |
| PFREUD_06840 | fold                  | Methylenetetrahydrofolate dehydrogenase (Bifunctional protein)                                                                                          | PPA1743 | CYT |
| PFREUD_06860 | mdh                   | Malate dehydrogenase                                                                                                                                    | PPA1740 | CYT |
| PFREUD_06910 |                       | Hypothetical protein                                                                                                                                    | PPA1735 | CYT |
| PFREUD_06930 | rnhA                  | Ribonuclease H                                                                                                                                          | PPA1729 | CYT |
| PFREUD_06950 | caiD                  | Enoyl-CoA hydratase/carnithine racemase CaiD                                                                                                            | PPA1899 | CYT |
| PFREUD_06960 | metG                  | Methionyl-tRNA synthetase (Methionine--tRNA ligase) (MetRS)                                                                                             | PPA1728 | CYT |
| PFREUD_07050 |                       | zinc-binding dehydrogenase                                                                                                                              | PPA2035 | CYT |
| PFREUD_07100 | accA                  | Acetyl-CoA carboxylase                                                                                                                                  | PPA1719 | CYT |
| PFREUD_07110 | mutM2                 | Formamidopyrimidine-DNA glycosylase (DNA- formamidopyrimidine glycosylase)                                                                              | PPA1623 | CYT |
| PFREUD_07150 | maf                   | Maf-like protein                                                                                                                                        | PPA1709 | CYT |
| PFREUD_07170 | pccB                  | Propionyl-CoA carboxylase beta chain                                                                                                                    | PPA1707 | CYT |
| PFREUD_07250 | birA                  | BirA, Biotin-(acetyl-CoA carboxylase) ligase                                                                                                            | PPA1705 | CYT |
| PFREUD_07290 |                       | Peptidase S51 family protein, dipeptidase E                                                                                                             | PPA1704 | CYT |
| PFREUD_07300 | purK                  | Phosphoribosylaminoimidazole carboxylase ATPase subunit                                                                                                 | PPA1702 | CYT |
| PFREUD_07330 | manC                  | Mannose-1-phosphate guanylyltransferase                                                                                                                 | PPA1696 | CYT |
| PFREUD_07350 | whiB1                 | Transcription factor WhiB                                                                                                                               | PPA1694 | CYT |
| PFREUD_07380 |                       | Hypothetical protein                                                                                                                                    | PPA1691 | CYT |
| PFREUD_07400 | pmm                   | Phosphomannomutase (PMM)                                                                                                                                | PPA2023 | CYT |
| PFREUD_07420 |                       | Hypothetical protein                                                                                                                                    | PPA1688 | CYT |
| PFREUD_07470 | malQ1                 | 4-alpha-glucanotransferase (Amylomaltase) (Disproportionating enzyme) (D-enzyme)                                                                        | PPA1683 | CYT |
| PFREUD_07480 | menC                  | O-succinylbenzoate-CoA synthase ( 4-(2'- carboxyphenyl)-4-oxybutyric acid synthase)                                                                     | PPA0902 | CYT |
| PFREUD_07490 | menD                  | Menaquinone biosynthesis protein                                                                                                                        | PPA0903 | CYT |
| PFREUD_07520 | menF                  | Isochorismate synthetase (enterochelin biosynthesis)                                                                                                    | PPA0904 | CYT |
| PFREUD_07530 | menE2                 | O-succinylbenzoic acid-CoA ligase (2- succinylbenzoate--CoA ligase)                                                                                     | PPA0906 | CYT |
| PFREUD_07540 | menB                  | Naphthoate synthase (Dihydroxynaphthoic acid synthetase)                                                                                                | PPA0907 | CYT |
| PFREUD_07550 | pncB                  | Nicotinate phosphoribosyltransferase                                                                                                                    | PPA1681 | CYT |
| PFREUD_07580 | murI                  | Glutamate racemase                                                                                                                                      | PPA1675 | CYT |
| PFREUD_07590 | rph                   | Ribonuclease PH (RNase PH) (tRNA nucleotidyltransferase)                                                                                                | PPA1674 | CYT |
| PFREUD_07610 | thyA                  | Thymidylate synthase                                                                                                                                    | PPA1672 | CYT |
| PFREUD_07630 | dinB                  | Nucleotidyltransferase/DNA polymerase involved in DNA repair (DNA polymerase IV)                                                                        | PPA1670 | CYT |
| PFREUD_07640 | argK                  | Kinase ArgK                                                                                                                                             | PPA0597 | CYT |
| PFREUD_07650 | mutB                  | Methylmalonyl-CoA mutase large subunit (Methylmalonyl-CoA mutase alpha subunit) (MCM-alpha) (MUTB- (R)-2- Methyl-3-oxopropanoyl-CoA CoA-carbonylmutase) | PPA0596 | CYT |
| PFREUD_07660 | mutA                  | Methylmalonyl-CoA mutase small subunit (Methylmalonyl-CoA mutase beta subunit) (MCB-beta)                                                               | PPA0595 | CYT |
| PFREUD_07680 | cbiL                  | CbiL Precorrin-2 C20-methyltransferase                                                                                                                  | PPA0420 | CYT |
| PFREUD_07690 | cbiF                  | CbiF Precorrin-4 C11-methyltransferase                                                                                                                  | PPA0421 | CYT |
| PFREUD_07700 | cobJ/cbiE/cbiG/c      |                                                                                                                                                         |         |     |
| PFREUD_07710 | biH                   | precorrin methylase (precorrin-3B C17- methyltransferase) CbiE/G/H fusion protein                                                                       | PPA0422 | CYT |
| PFREUD_07730 | cysG/cbiX             | CysG/CbiX                                                                                                                                               | PPA0423 | CYT |
| PFREUD_07750 | cbiC                  | Precorrin 8X methylmutase CbiC                                                                                                                          | PPA0429 | CYT |
| PFREUD_07770 | cbiT                  | Precorrin 8 decarboxylase CbiT                                                                                                                          | PPA0436 | CYT |
| PFREUD_07790 | bcp                   | Bcp Putative peroxiredoxin (Thioredoxin reductase)                                                                                                      | PPA1661 | CYT |
| PFREUD_07830 | cobB/cobQ             | (glutamine amidotransferase) (adenosylcobyric acid synthase (glutamine-hydrolysing))                                                                    | PPA1654 | CYT |
| PFREUD_07840 |                       | UDP-N-acetylmuramyl tripeptide synthase (Mur ligase)                                                                                                    | PPA1653 | CYT |
| PFREUD_07890 | orn                   | Oligoribonuclease                                                                                                                                       | PPA1642 | CYT |
| PFREUD_07930 |                       | ABC transporter                                                                                                                                         | PPA1639 | CYT |
| PFREUD_07960 | ssb2                  | Single-stranded DNA-binding protein 2 (SSB 2) (Helix-destabilizing protein 2)                                                                           | PPA1637 | CYT |
| PFREUD_07970 |                       | ABC transporter ATP-binding protein                                                                                                                     | PPA1636 | CYT |
| PFREUD_07980 | dhaK                  | DhaK PTS-dependent dihydroxyacetone kinase, dihydroxyacetone-binding subunit                                                                            | PPA1947 | CYT |
| PFREUD_07990 | dhaL                  | PTS-dependent dihydroxyacetone kinase, ADP- binding subunit DhaL                                                                                        | PPA1948 | CYT |
| PFREUD_08010 | galT                  | Galactose-1-phosphate uridylyltransferase (UDP- glucose---hexose-1-phosphate uridylyltransferase)                                                       | PPA2218 | CYT |
| PFREUD_08040 |                       | oxidoreductase                                                                                                                                          | PPA1634 | CYT |
| PFREUD_08050 | marR1                 | Transcriptional regulator, MarR family                                                                                                                  | PPA1633 | CYT |
| PFREUD_08060 |                       | long-chain fatty-acid CoA ligase (AMP-binding enzyme) ( long-chain-fatty-acid---CoA ligase)                                                             | PPA1632 | CYT |
| PFREUD_08070 | pf2652                | Hypothetical protein                                                                                                                                    | PPA1631 | CYT |
| PFREUD_08080 | thiD2                 | hydroxymethylpyrimidine/phosphomethylpyrimidinekinase                                                                                                   | PPA1712 | CYT |
| PFREUD_08090 | gnd2                  | 6-phosphogluconate dehydrogenase, decarboxylating                                                                                                       | PPA1629 | CYT |
| PFREUD_08100 | pepN                  | Aminopeptidase N , Lysyl aminopeptidase                                                                                                                 | PPA1627 | CYT |
| PFREUD_08130 | ligA                  | DNA ligase (NAD+)                                                                                                                                       | PPA1626 | CYT |
| PFREUD_08210 | tig                   | Trigger factor (TF)                                                                                                                                     | PPA1575 | CYT |
| PFREUD_08240 | clpP1                 | ATP-dependent Clp protease proteolytic subunit 1 (Endopeptidase Clp 1)                                                                                  | PPA1573 | CYT |
| PFREUD_08250 | clpP2                 | ATP-dependent Clp protease proteolytic subunit 2 (Endopeptidase Clp 2)                                                                                  | PPA1572 | CYT |
| PFREUD_08260 | clpX                  | ATP-dependent Clp protease (ATP-dependent Clp protease, ATP-binding subunit ClpX)                                                                       | PPA1571 | CYT |
| PFREUD_08290 | pfkA                  | 6-phosphofructokinase                                                                                                                                   | PPA0090 | CYT |
| PFREUD_08310 | valS                  | Valyl-tRNA synthetase (Valine--tRNA ligase) (ValRS)                                                                                                     | PPA1568 | CYT |
| PFREUD_08350 | folC                  | Folypolyglutamate synthase (bifunctional enzyme)                                                                                                        | PPA0821 | CYT |
| PFREUD_08360 | ndk                   | Nucleoside-diphosphate kinase                                                                                                                           | PPA0823 | CYT |
| PFREUD_08380 |                       | Fe-S oxidoreductases family 2                                                                                                                           | PPA0824 | CYT |
| PFREUD_08420 |                       | Hypothetical protein                                                                                                                                    | PPA0825 | CYT |
| PFREUD_08450 | rplU                  | 50S ribosomal protein L21                                                                                                                               | PPA0827 | CYT |
| PFREUD_08460 | rpmA                  | 50S ribosomal protein L27                                                                                                                               | PPA0829 | CYT |
| PFREUD_08480 | obg                   | GTPase                                                                                                                                                  | PPA0833 | CYT |

|              |             |                                                                                                                                                    |         |     |
|--------------|-------------|----------------------------------------------------------------------------------------------------------------------------------------------------|---------|-----|
| PFREUD_08490 | proB        | Glutamate 5-kinase (Gamma-glutamyl kinase) (GK)                                                                                                    | PPA0834 | CYT |
| PFREUD_08510 | proA        | Gamma-glutamyl phosphate reductase (GPR) (Glutamate-5- semialdehyde dehydrogenase) (Glutamyl-gamma-semialdehyde dehydrogenase) (GSA dehydrogenase) | PPA0835 | CYT |
| PFREUD_08540 |             | Conserved protein, DUF143 domain                                                                                                                   | PPA0837 | CYT |
| PFREUD_08600 |             | Hypothetical protein                                                                                                                               | PPA0891 | CYT |
| PFREUD_08610 | leuS        | Leucyl-tRNA synthetase (Leucine--tRNA ligase) (LeuRS)                                                                                              | PPA0893 | CYT |
| PFREUD_08620 | pyrC        | Dihydroorotase multifunctional complex type (dihydroorotase)                                                                                       | PPA0998 | CYT |
| PFREUD_08630 | PPA0888     | NAD-dependent malic enzyme (NAD-ME) (Malate dehydrogenase)                                                                                         | PPA0888 | CYT |
| PFREUD_08660 | holA        | DNA polymerase III, delta subunit                                                                                                                  | PPA0897 | CYT |
| PFREUD_08680 | rpsT        | 30S Ribosomal protein S20p                                                                                                                         | PPA0898 | CYT |
| PFREUD_08710 | lepA        | GTP-binding protein LepA                                                                                                                           | PPA0901 | CYT |
| PFREUD_08720 | hemM        | Coproporphyrinogen oxidase / Oxygen-independent coproporphyrinogen III oxidase                                                                     | PPA0911 | CYT |
| PFREUD_08730 |             | Hypothetical protein                                                                                                                               | PPA0912 | CYT |
| PFREUD_08740 |             | inositol-phosphate phosphatase                                                                                                                     | PPA0913 | CYT |
| PFREUD_08750 | hrcA        | Heat-inducible transcription repressor hrcA                                                                                                        | PPA0915 | CYT |
| PFREUD_08760 | dnaJ3       | Chaperone protein dnaJ 3 (DnaJ3 protein) (Heat shock protein 40 3)                                                                                 | PPA0916 | CYT |
| PFREUD_08770 |             | Hypothetical protein                                                                                                                               | PPA0917 | CYT |
| PFREUD_08790 |             | Queuine tRNA-ribosyltransferase                                                                                                                    | PPA0924 | CYT |
| PFREUD_08810 | pip2        | Proline iminopeptidase                                                                                                                             | PPA0932 | CYT |
| PFREUD_08840 | phoH        | Phosphate starvation-inducible protein PhoH-like protein                                                                                           | PPA0936 | CYT |
| PFREUD_08850 |             | Hypothetical protein                                                                                                                               | PPA0937 | CYT |
| PFREUD_08870 | era         | GTP-binding protein                                                                                                                                | PPA0939 | CYT |
| PFREUD_08910 |             | Metal-dependent hydrolase                                                                                                                          | PPA0940 | CYT |
| PFREUD_08920 | leuA1       | 2-isopropylmalate synthase                                                                                                                         | PPA0941 | CYT |
| PFREUD_08930 |             | Hypothetical protein                                                                                                                               | PPA0409 | CYT |
| PFREUD_08940 | uppS2       | Undecaprenyl diphosphate synthase (di-trans,poly- cis-decaprenylcistransferase)                                                                    | PPA0942 | CYT |
| PFREUD_08950 | recO        | DNA repair protein recO (Recombination protein O)                                                                                                  | PPA0944 | CYT |
| PFREUD_09130 | pduP        | CoA-dependent propionaldehyde dehydrogenase PduP                                                                                                   | PPA1741 | CYT |
| PFREUD_09190 | glyQS       | Glycyl-tRNA synthetase (Glycine--tRNA ligase) (GlyRS)                                                                                              | PPA0949 | CYT |
| PFREUD_09250 | sdhA        | Succinate dehydrogenase, subunit A                                                                                                                 | PPA0951 | CYT |
| PFREUD_09260 | sdhB        | Succinate dehydrogenase, subunit B                                                                                                                 | PPA0952 | CYT |
| PFREUD_09280 | dgt         | Deoxyguanosinetriphosphate triphosphohydrolase (dGTPase)                                                                                           | PPA0955 | CYT |
| PFREUD_09320 | cof         | Cof-like hydrolase                                                                                                                                 | PPA0973 | CYT |
| PFREUD_09340 | moxR        | ATPases MoxR family                                                                                                                                | PPA0974 | CYT |
| PFREUD_09350 |             | Hypothetical protein                                                                                                                               | PPA0975 | CYT |
| PFREUD_09380 |             | alanine racemase                                                                                                                                   | PPA0978 | CYT |
| PFREUD_09400 |             | Hypothetical protein                                                                                                                               | PPA0979 | CYT |
| PFREUD_09410 | fabF (fabB) | 3-oxoacyl-[acyl-carrier-protein] synthase ( Beta- ketoacyl-ACP synthase)                                                                           | PPA0980 | CYT |
| PFREUD_09420 | acpP        | Acyl carrier protein (ACP)                                                                                                                         | PPA0982 | CYT |
| PFREUD_09440 | pf3004      | Carboxylic ester hydrolase                                                                                                                         | PPA0984 | CYT |
| PFREUD_09450 |             | Hypothetical protein                                                                                                                               | PPA0988 | CYT |
| PFREUD_09470 | aceE        | dehydrogenase E1 component (2-oxo-acid dehydrogenase E1 subunit, homodimeric type)                                                                 | PPA0989 | CYT |
| PFREUD_09480 |             | Hypothetical protein                                                                                                                               | PPA0991 | CYT |
| PFREUD_09550 | fnk         | fructosamine kinase                                                                                                                                | PPA1005 | CYT |
| PFREUD_09580 | prfB        | Peptide chain release factor 2 (RF-2)                                                                                                              | PPA1354 | CYT |
| PFREUD_09590 | ftsE        | ABC transporter, ATP-binding protein                                                                                                               | PPA1353 | CYT |
| PFREUD_09630 | smgB        | SmpB SsrA-binding protein                                                                                                                          | PPA1351 | CYT |
| PFREUD_09650 |             | Hypothetical protein                                                                                                                               | PPA1339 | CYT |
| PFREUD_09660 |             | two-component system response regulator                                                                                                            | PPA1338 | CYT |
| PFREUD_09670 | prt         | phosphoribosyltransferase                                                                                                                          | PPA1335 | CYT |
| PFREUD_09680 |             | ribosomal S30AE, sigma 54 modulation protein                                                                                                       | PPA1334 | CYT |
| PFREUD_09690 |             | Preprotein translocase SecA subunit                                                                                                                | PPA1333 | CYT |
| PFREUD_09710 |             | Hypothetical protein                                                                                                                               | PPA1331 | CYT |
| PFREUD_09730 |             | Hypothetical protein                                                                                                                               | PPA1330 | CYT |
| PFREUD_09740 | PPA1328     | Predicted metal-dependent phosphoesterase                                                                                                          | PPA1328 | CYT |
| PFREUD_09750 | trpS        | Tryptophanyl-tRNA synthetase                                                                                                                       | PPA1327 | CYT |
| PFREUD_09760 |             | DEAD/DEAH box helicase domain protein                                                                                                              | PPA1325 | CYT |
| PFREUD_09780 |             | Hypothetical protein                                                                                                                               | PPA1323 | CYT |
| PFREUD_09810 |             | ATP-dependent DNA helicase                                                                                                                         | PPA1320 | CYT |
| PFREUD_09820 | urvD        | UvrD/REP helicase / ATP-dependent DNA helicase                                                                                                     | PPA1319 | CYT |
| PFREUD_09840 | recD        | Probable exodeoxyribonuclease V alpha chain RecD                                                                                                   | PPA1317 | CYT |
| PFREUD_09850 | recB        | Exodeoxyribonuclease V beta chain RecB                                                                                                             | PPA1316 | CYT |
| PFREUD_09860 | recC        | Exodeoxyribonuclease V gamma subunit RecC                                                                                                          | PPA1315 | CYT |
| PFREUD_09880 | uvrD        | DNA helicase                                                                                                                                       | PPA1314 | CYT |
| PFREUD_09910 |             | metal dependant hydrolase                                                                                                                          | PPA1312 | CYT |
| PFREUD_09920 |             | Hypothetical protein                                                                                                                               | PPA1311 | CYT |
| PFREUD_09950 |             | Hypothetical protein                                                                                                                               | PPA1309 | CYT |
| PFREUD_09970 |             | Zn dependant peptidase                                                                                                                             | PPA0122 | CYT |
| PFREUD_09990 | pip1        | Proline iminopeptidase                                                                                                                             | PPA2174 | CYT |
| PFREUD_10000 |             | acetyltransferase                                                                                                                                  | PPA0096 | CYT |
| PFREUD_10010 | bioB        | Biotin synthase                                                                                                                                    | PPA1407 | CYT |
| PFREUD_10060 |             | ATP-binding ABC transporter protein                                                                                                                | PPA1274 | CYT |
| PFREUD_10070 |             | ABC transporter ATP-binding protein                                                                                                                | PPA1273 | CYT |
| PFREUD_10080 |             | D-3-phosphoglycerate dehydrogenase / erythronate 4-phosphate dehydrogenase                                                                         | PPA1272 | CYT |
| PFREUD_10160 |             | monophosphatase                                                                                                                                    | PPA1271 | CYT |
| PFREUD_10170 | engC        | GTPase                                                                                                                                             | PPA1269 | CYT |
| PFREUD_10180 | aroA        | 3-phosphoshikimate 1-carboxyvinyltransferase (phosphoenolpyruvate:3-phosphoshikimate5-O-(1- carboxyvinyl)-transferase) (EPSP synthase)             | PPA1268 | CYT |
| PFREUD_10200 | rpoE        | RNA polymerase sigma -70 factor, sigma-E factor                                                                                                    | PPA1266 | CYT |
| PFREUD_10210 |             | anti-sigma factor                                                                                                                                  | PPA2382 | CYT |
| PFREUD_10230 |             | Sensory transduction histidine kinase                                                                                                              | PPA1265 | CYT |
| PFREUD_10250 | odhA        | 2-oxoglutarate dehydrogenase, E1 and E2 components                                                                                                 | PPA1261 | CYT |
| PFREUD_10300 | lysA        | Diaminopimelate decarboxylase (DAP decarboxylase)                                                                                                  | PPA1259 | CYT |
| PFREUD_10320 | thrA/hom    | Homoserine dehydrogenase                                                                                                                           | PPA1258 | CYT |
| PFREUD_10340 |             | Transcription termination factor Rho                                                                                                               | PPA1254 | CYT |
| PFREUD_10350 | rpmE        | 50S ribosomal protein L31                                                                                                                          | PPA1253 | CYT |
| PFREUD_10360 | prfA        | Peptide chain release factor 1 (RF-1)                                                                                                              | PPA1252 | CYT |
| PFREUD_10370 | hemK        | Methylase                                                                                                                                          | PPA1250 | CYT |
| PFREUD_10460 | atpH        | ATP synthase delta chain                                                                                                                           | PPA1242 | CYT |
| PFREUD_10470 | atpA        | ATP synthase subunit alpha (ATPase subunit alpha) (ATP synthase F1 sector subunit alpha)                                                           | PPA1241 | CYT |
| PFREUD_10480 | atpG        | ATP synthase gamma chain (ATP synthase F1 sector gamma subunit)                                                                                    | PPA1240 | CYT |
| PFREUD_10490 | atpD        | ATP synthase subunit beta (ATPase subunit beta) (ATP synthase F1 sector subunit beta)                                                              | PPA1239 | CYT |
| PFREUD_10530 |             | Cobalamin adenosyltransferase                                                                                                                      | PPA1236 | CYT |
| PFREUD_10540 | pf1509      | Putative carboxylic ester hydrolase                                                                                                                | PPA1101 | CYT |

|              |             |                                                                                                                                                                                                                                                                    |         |     |
|--------------|-------------|--------------------------------------------------------------------------------------------------------------------------------------------------------------------------------------------------------------------------------------------------------------------|---------|-----|
| PFREUD_10560 |             | Nuclease of the RecB family                                                                                                                                                                                                                                        | PPA1102 | CYT |
| PFREUD_10590 |             | Methylmalonyl-CoA epimerase                                                                                                                                                                                                                                        | PPA1104 | CYT |
| PFREUD_10600 | trxA3       | Thioredoxin                                                                                                                                                                                                                                                        | PPA1106 | CYT |
| PFREUD_10610 | pgm1        | Phosphoglucomutase                                                                                                                                                                                                                                                 | PPA1105 | CYT |
| PFREUD_10620 |             | NUDIX hydrolase                                                                                                                                                                                                                                                    | PPA1110 | CYT |
| PFREUD_10630 | glgB        | 1,4-alpha-glucan branching enzyme (Glycogen branching enzyme) (BE) (1,4-alpha-D-glucan:1,4-alpha-D- glucan 6 glucosyl- transferase)                                                                                                                                | PPA1111 | CYT |
| PFREUD_10640 | PPA1112     | Uncharacterized protein probably involved in trehalose biosynthesis                                                                                                                                                                                                | PPA1112 | CYT |
| PFREUD_10650 | treS        | Trehalose synthase                                                                                                                                                                                                                                                 | PPA1113 | CYT |
| PFREUD_10660 | glgE        | Glycosyl hydrolase, family 13 (putative alpha- amylase, catalytic domain)                                                                                                                                                                                          | PPA1114 | CYT |
| PFREUD_10700 | glgX/treX   | Glycogen debranching enzyme GlgX Isoamylase                                                                                                                                                                                                                        | PPA1115 | CYT |
| PFREUD_10710 | trmU        | tRNA (5-methylaminomethyl-2-thiouridylate)- methyltransferase                                                                                                                                                                                                      | PPA1117 | CYT |
| PFREUD_10720 | metE        | Methionine synthase, vitamin-B12 independent                                                                                                                                                                                                                       | PPA1118 | CYT |
| PFREUD_10740 |             | Amino acid-binding ACT                                                                                                                                                                                                                                             | PPA1121 | CYT |
| PFREUD_10750 | gatC        | Glutamyl-tRNA(Gln) amidotransferase subunit C (Aspartyl/glutamyl-tRNA(Asn/Gln) amidotransferase subunit C)                                                                                                                                                         | PPA1122 | CYT |
| PFREUD_10760 | gatA        | Glutamyl-tRNA(Gln) amidotransferase subunit A (Glu-ADT subunit A)                                                                                                                                                                                                  | PPA1123 | CYT |
| PFREUD_10770 | gatB        | Aspartyl/glutamyl-tRNA(Asn/Gln) amidotransferase subunit B (Asp/Glu-ADT subunit B)                                                                                                                                                                                 | PPA1124 | CYT |
| PFREUD_10890 | lpd         | Dihydrolipoyl dehydrogenase (E3 component of alpha keto acid dehydrogenase complexes) (Dihydrolipoamide dehydrogenase)                                                                                                                                             | PPA1227 | CYT |
| PFREUD_10900 | MurA        | UDP-N-acetylglucosamine 1- carboxyvinyltransferase (Enoylpyruvate transferase)                                                                                                                                                                                     | PPA1226 | CYT |
| PFREUD_10910 | pdxY        | Pyridoxal kinase                                                                                                                                                                                                                                                   | PPA1225 | CYT |
| PFREUD_10930 | glpQ        | glycerophosphoryl diester phosphodiesterase                                                                                                                                                                                                                        | PPA1224 | CYT |
| PFREUD_10940 |             | Hypothetical protein                                                                                                                                                                                                                                               | PPA1223 | CYT |
| PFREUD_10950 | dpm         | dolichyl-phosphate beta-D-mannosyltransferase                                                                                                                                                                                                                      | PPA1222 | CYT |
| PFREUD_10980 |             | AsnC-family transcriptional regulatory protein                                                                                                                                                                                                                     | PPA1220 | CYT |
| PFREUD_11050 | luxS        | S-ribosylhomocysteine lyase (Autoinducer-2 production protein luxS) (AI-2 synthesis protein)                                                                                                                                                                       | PPA0450 | CYT |
| PFREUD_11250 |             | Hypothetical protein                                                                                                                                                                                                                                               | PPA1342 | CYT |
| PFREUD_11260 | engA        | GTP binding protein                                                                                                                                                                                                                                                | PPA1210 | CYT |
| PFREUD_11270 | cmk         | Cytidylate kinase (CK) (Cytidine monophosphate kinase) (CMP kinase)                                                                                                                                                                                                | PPA1209 | CYT |
| PFREUD_11280 | tyrA        | Prephenate dehydrogenase                                                                                                                                                                                                                                           | PPA1208 | CYT |
| PFREUD_11290 | prcA        | 20S proteasome alpha-subunit                                                                                                                                                                                                                                       | PPA1207 | CYT |
| PFREUD_11300 | pcrB        | 20S proteasome beta-subunit                                                                                                                                                                                                                                        | PPA1206 | CYT |
| PFREUD_11350 |             | Hypothetical protein                                                                                                                                                                                                                                               | PPA1200 | CYT |
| PFREUD_11370 | rpe         | Ribulose-phosphate 3-epimerase                                                                                                                                                                                                                                     | PPA1199 | CYT |
| PFREUD_11380 |             | Sun, tRNA and rRNA cytosine-C5-methylases                                                                                                                                                                                                                          | PPA1196 | CYT |
| PFREUD_11390 | fmt         | Methionyl-tRNA formyltransferase                                                                                                                                                                                                                                   | PPA1195 | CYT |
| PFREUD_11400 | priA        | Primosomal protein N                                                                                                                                                                                                                                               | PPA1194 | CYT |
| PFREUD_11410 | metK        | S-adenosylmethionine synthetase (Methionine adenosyltransferase) (AdoMet synthetase) (MAT)                                                                                                                                                                         | PPA1193 | CYT |
| PFREUD_11420 | rpoZ        | DNA-directed RNA polymerase omega chain (RNAP omega subunit) (Transcriptase omega chain) (RNA polymerase omega subunit)                                                                                                                                            | PPA1191 | CYT |
| PFREUD_11430 | gmk         | Guanylate kinase , Guanosine monophosphate kinase (GMP kinase)                                                                                                                                                                                                     | PPA1190 | CYT |
| PFREUD_11440 | mihF        | Integration host factor MihF                                                                                                                                                                                                                                       | PPA1189 | CYT |
| PFREUD_11470 | carB (pyrA) | Carbamoyl-phosphate synthase large chain (Carbamoyl- phosphate synthetase ammonia chain)                                                                                                                                                                           | PPA1000 | CYT |
| PFREUD_11480 | carA        | Carbamoyl-phosphate synthase small chain                                                                                                                                                                                                                           | PPA0999 | CYT |
| PFREUD_11530 | aroF        | Chorismate synthase (5-enolpyruvylshikimate-3- phosphate phospholyase)                                                                                                                                                                                             | PPA1182 | CYT |
| PFREUD_11560 | alaS        | Alanyl-tRNA synthetase (Alanine--tRNA ligase) (AlaRS)                                                                                                                                                                                                              | PPA1178 | CYT |
| PFREUD_11570 | ldh1        | L-Lactate dehydrogenase                                                                                                                                                                                                                                            | PPA1952 | CYT |
| PFREUD_11580 |             | Uncharacterized ATPase related to the helicase subunit of the holliday junction resolvase                                                                                                                                                                          | PPA1176 | CYT |
| PFREUD_11590 | aspS        | Aspartyl-tRNA synthetase (Aspartate--tRNA ligase) (AspRS)                                                                                                                                                                                                          | PPA1175 | CYT |
| PFREUD_11600 |             | Hypothetical protein                                                                                                                                                                                                                                               | PPA1174 | CYT |
| PFREUD_11620 | hisS        | Histidyl-tRNA synthetase (Histidine--tRNA ligase) (HisRS)                                                                                                                                                                                                          | PPA1169 | CYT |
| PFREUD_11630 |             | Beta-lactamase-like                                                                                                                                                                                                                                                | PPA1168 | CYT |
| PFREUD_11640 |             | Hypothetical protein                                                                                                                                                                                                                                               | PPA1167 | CYT |
| PFREUD_11650 | relA        | GTP pyrophosphokinase                                                                                                                                                                                                                                              | PPA1166 | CYT |
| PFREUD_11660 | apt         | Adenine phosphoribosyltransferase (AMP:diphosphate phospho-D-ribosyltransferase)                                                                                                                                                                                   | PPA1164 | CYT |
| PFREUD_11700 | ruvB        | Holliday junction ATP-dependent DNA helicase                                                                                                                                                                                                                       | PPA1160 | CYT |
| PFREUD_11710 | ruvA        | Holliday junction ATP-dependent DNA helicase                                                                                                                                                                                                                       | PPA1159 | CYT |
| PFREUD_11720 | ruvC        | Crossover junction endodeoxyribonuclease (Holliday junction nuclease ) (Holliday junction resolvase)                                                                                                                                                               | PPA1158 | CYT |
| PFREUD_11730 |             | Hypothetical protein                                                                                                                                                                                                                                               | PPA1157 | CYT |
| PFREUD_11750 | hisA        | Phosphoribosyl isomerase A (1-(5-phosphoribosyl)- 5-[(5- phosphoribosylamino)methylideneamino] imidazole-4-carboxamide isomerase) (Phosphoribosylformimino-5- aminoimidazole carboxamide ribotide isomerase) (N-(5 - phosphoribosyl)anthranilate isomerase) (PRAI) | PPA1156 | CYT |
| PFREUD_11760 | hisH        | Imidazole glycerol phosphate synthase subunit hisH (IGP synthase glutamine amidotransferase subunit) (IGP synthase subunit hisH) (ImGP synthase subunit hisH) (IGPS subunit hisH)                                                                                  | PPA1155 | CYT |
| PFREUD_11770 | hisB        | Imidazoleglycerol-phosphate dehydratase (IGPD)                                                                                                                                                                                                                     | PPA1154 | CYT |
| PFREUD_11780 | hisC        | Histidinol-phosphate aminotransferase (Imidazole acetol- phosphate transaminase)                                                                                                                                                                                   | PPA1153 | CYT |
| PFREUD_11790 | hisD        | Histidinol dehydrogenase (HDH)                                                                                                                                                                                                                                     | PPA1152 | CYT |
| PFREUD_11810 | ybaK/EbsC   | YbaC/EbsC protein                                                                                                                                                                                                                                                  | PPA2262 | CYT |
| PFREUD_11830 | dnaE1       | DNA polymerase III alpha subunit                                                                                                                                                                                                                                   | PPA1150 | CYT |
| PFREUD_11850 | gltD        | Glutamate synthase small subunit                                                                                                                                                                                                                                   | PPA1135 | CYT |
| PFREUD_11860 | gltB        | Glutamate synthase large subunit (Ferrodoxin)                                                                                                                                                                                                                      | PPA1134 | CYT |
| PFREUD_11890 | trpB        | Tryptophan synthase beta chain (TrpB)                                                                                                                                                                                                                              | PPA1131 | CYT |
| PFREUD_11900 | trpC        | Indole-3-glycerol phosphate synthase (TrpC)                                                                                                                                                                                                                        | PPA1130 | CYT |
| PFREUD_11920 | hisI2       | Phosphoribosyl-AMP cyclohydrolase                                                                                                                                                                                                                                  | PPA1126 | CYT |
| PFREUD_11930 |             | Hypothetical protein                                                                                                                                                                                                                                               | PPA1125 | CYT |
| PFREUD_11940 | glnS        | Glutaminyl-tRNA synthetase                                                                                                                                                                                                                                         | PPA1870 | CYT |
| PFREUD_11990 |             | Hypothetical protein                                                                                                                                                                                                                                               | PPA1099 | CYT |
| PFREUD_12020 |             | SuaS_yciO_ yrdC                                                                                                                                                                                                                                                    | PPA1092 | CYT |
| PFREUD_12040 | pfp (pfk)   | pyrophosphate phosphofructokinase                                                                                                                                                                                                                                  | PPA1090 | CYT |
| PFREUD_12060 |             | Hypothetical protein                                                                                                                                                                                                                                               | PPA0959 | CYT |
| PFREUD_12070 | hrdD1       | RNA polymerase principal sigma factor HrdD                                                                                                                                                                                                                         | PPA0958 | CYT |
| PFREUD_12080 | dnaG1       | DNA primase                                                                                                                                                                                                                                                        | PPA0957 | CYT |
| PFREUD_12170 | otsA        | Trehalose-6-phosphate synthase (Alpha,alpha- trehalose-phosphate synthase)                                                                                                                                                                                         | PPA0961 | CYT |
| PFREUD_12190 | cbiB/cobD   | CbiB/CobD                                                                                                                                                                                                                                                          | PPA0418 | CYT |
| PFREUD_12200 | cbiP/cobQ   | Cobyric acid synthase CbiP/CobQ                                                                                                                                                                                                                                    | PPA0419 | CYT |
| PFREUD_12210 | cobA2       | Cob(I)alamin adenosyltransferase                                                                                                                                                                                                                                   | PPA0437 | CYT |
| PFREUD_12300 | gcvP        | Glycine dehydrogenase [decarboxylating] (Glycine decarboxylase) (Glycine cleavage system P-protein)                                                                                                                                                                | PPA0742 | CYT |
| PFREUD_12320 |             |                                                                                                                                                                                                                                                                    | PPA1086 | CYT |
| PFREUD_12330 | merR1       | Transcriptional regulator, MerR                                                                                                                                                                                                                                    | PPA1085 | CYT |
| PFREUD_12340 |             | Forkhead-associated protein                                                                                                                                                                                                                                        | PPA1084 | CYT |
| PFREUD_12350 | gcvH        | Glycine cleavage H-protein (lipoate-binding)                                                                                                                                                                                                                       | PPA0743 | CYT |
| PFREUD_12440 | thrS        | Threonyl-tRNA synthetase (Threonine--tRNA ligase) (ThrRS)                                                                                                                                                                                                          | PPA1076 | CYT |

|              |             |                                                                                                                             |         |     |
|--------------|-------------|-----------------------------------------------------------------------------------------------------------------------------|---------|-----|
| PFREUD_12500 |             | Hypothetical protein                                                                                                        | PPA1066 | CYT |
| PFREUD_12520 | msrB        | L-methionine (S)-S-oxide reductase                                                                                          | PPA1065 | CYT |
| PFREUD_12530 | ybaK        | YbaK / prolyl-tRNA synthetases                                                                                              | PPA2186 | CYT |
| PFREUD_12540 |             | Hypothetical protein                                                                                                        | PPA1064 | CYT |
| PFREUD_12550 | rnd         | Ribonuclease D (3'-5' exonuclease)                                                                                          | PPA1063 | CYT |
| PFREUD_12560 | dxs         | Deoxyxylulose-5-phosphate synthase                                                                                          | PPA1062 | CYT |
| PFREUD_12590 | acn         | Aconitase, Aconitate hydratase                                                                                              | PPA1061 | CYT |
| PFREUD_12680 |             | SAM-dependent methyltransferase related to tRNA (tRNA (uracil-5-)-methyltransferase)                                        | PPA1060 | CYT |
| PFREUD_12700 | TrkA        | Trk system potassium uptake protein TrkA                                                                                    | PPA1058 | CYT |
| PFREUD_12710 | trkA (ceoC) | Trk system potassium uptake protein TrkA (K(+)- uptake protein TrkA)                                                        | PPA1057 | CYT |
| PFREUD_12720 |             | Nucleic acid binding, OB-fold, tRNA/helicase- type                                                                          | PPA1056 | CYT |
| PFREUD_12770 |             | Type I phosphodiesterase / nucleotide pyrophosphatase                                                                       | PPA1048 | CYT |
| PFREUD_12780 |             | Hypothetical protein                                                                                                        | PPA1047 | CYT |
| PFREUD_12790 |             | Hypothetical protein                                                                                                        | PPA1046 | CYT |
| PFREUD_12800 | gyrA2       | DNA gyrase subunit A (DNA topoisomerase (ATP- hydrolysing))                                                                 | PPA1045 | CYT |
| PFREUD_12810 | panE        | 2-dehydropantoate 2-reductase                                                                                               | PPA0985 | CYT |
| PFREUD_12820 | gyrB1       | DNA gyrase subunit B                                                                                                        | PPA1042 | CYT |
| PFREUD_12840 | ldh2        | L-lactate dehydrogenase                                                                                                     | PPA0887 | CYT |
| PFREUD_12850 | hrdB        | RNA polymerase principal sigma factor HrdB                                                                                  | PPA1032 | CYT |
| PFREUD_12860 | hrdD2       | RNA polymerase principal sigma factor HrdD                                                                                  | PPA1031 | CYT |
| PFREUD_12910 | pf1637      | Putative carboxylic ester hydrolase                                                                                         | PPA1030 | CYT |
| PFREUD_12920 | hrpA2       | ATP-dependent helicase HrpA                                                                                                 | PPA1029 | CYT |
| PFREUD_12960 | deoR2       | DeoR transcriptional regulator                                                                                              | PPA2306 | CYT |
| PFREUD_12970 | glpC        | Anaerobic glycerol-3-phosphate dehydrogenase subunit C                                                                      | PPA2248 | CYT |
| PFREUD_12980 | glpB        | Anaerobic glycerol-3-phosphate dehydrogenase subunit B                                                                      | PPA2249 | CYT |
| PFREUD_12990 | glpA        | Anaerobic glycerol-3-phosphate dehydrogenase subunit A                                                                      | PPA2250 | CYT |
| PFREUD_13010 | nrdJ        | Vitamin B12-dependent ribonucleotide reductase (Ribonucleoside-diphosphate reductase NrdJ)                                  | PPA1026 | CYT |
| PFREUD_13020 | nrdR        | Transcriptional repressor nrdR                                                                                              | PPA1025 | CYT |
| PFREUD_13050 | dinG        | ATP-dependent helicase                                                                                                      | PPA1022 | CYT |
| PFREUD_13060 |             | FeoB, Ferrous iron transport protein B                                                                                      | PPA1021 | CYT |
| PFREUD_13070 | dapF        | Diaminopimelate epimerase                                                                                                   | PPA1020 | CYT |
| PFREUD_13080 | miaA        | TRNA isopentenyltransferase                                                                                                 | PPA1019 | CYT |
| PFREUD_13090 | miaB1       | 2-methylthioadenine synthetase MiaB protein                                                                                 | PPA1017 | CYT |
| PFREUD_13130 | recA        | RecA (Recombinase A)                                                                                                        | PPA1012 | CYT |
| PFREUD_13140 |             | Hypothetical protein                                                                                                        | PPA1011 | CYT |
| PFREUD_13180 | cinA        | CinA, Competence-damaged protein                                                                                            | PPA1008 | CYT |
| PFREUD_13200 | miaB2       | 2-methylthioadenine synthetase MiaB protein                                                                                 | PPA1006 | CYT |
| PFREUD_13220 | thiL        | Thiamine monophosphate kinase                                                                                               | PPA1357 | CYT |
| PFREUD_13250 | ddlA        | D-alanine--D-alanine ligase (D-alanylalanine synthetase)                                                                    | PPA1359 | CYT |
| PFREUD_13260 | plsC1       | 1-acylglycerol-3-phosphate O-acyltransferase                                                                                | PPA1360 | CYT |
| PFREUD_13290 | iclR        | IclR transcriptional regulator                                                                                              | PPA1364 | CYT |
| PFREUD_13330 | PPA1366     | Putative 2-hydroxyhepta-2,4-diene-1,7-dioate isomerase                                                                      | PPA1366 | CYT |
| PFREUD_13350 | ilvE (bcaT) | Branched-chain amino acid aminotransferase                                                                                  | PPA1368 | CYT |
| PFREUD_13390 | ilvC        | Ketol-acid reductoisomerase (Acetohydroxy-acid isomeroeductase) (Alpha-keto-beta-hydroxylacil reductoisomerase)             | PPA1372 | CYT |
| PFREUD_13430 | hisF        | Imidazole glycerol phosphate synthase subunit HisF                                                                          | PPA1376 | CYT |
| PFREUD_13460 |             | Superfamily II RNA helicase                                                                                                 | PPA1377 | CYT |
| PFREUD_13470 | cof2        | Cof protein:HAD-superfamily hydrolase subfamily IIB                                                                         | PPA0211 | CYT |
| PFREUD_13530 |             | Regulatory protein                                                                                                          | PPA1381 | CYT |
| PFREUD_13540 |             | DeoR-family transcriptional regulator                                                                                       | PPA1382 | CYT |
| PFREUD_13550 | gluQ        | Glutamyl-Q tRNA(Asp) synthetase (Glu-Q-RSs), Glutamyl-Q tRNA(Asp) synthetase                                                | PPA1383 | CYT |
| PFREUD_13580 | rluB        | Pseudouridine synthase                                                                                                      | PPA1385 | CYT |
| PFREUD_13620 |             | ATPase involved in cell division                                                                                            | PPA1387 | CYT |
| PFREUD_13630 | xerD        | Site-specific recombinase                                                                                                   | PPA1388 | CYT |
| PFREUD_13640 | nudF        | ADP-ribose pyrophosphatase                                                                                                  | PPA1389 | CYT |
| PFREUD_13650 | pyrG        | CTP synthase (UTP--ammonia ligase) (CTP synthetase)                                                                         | PPA1390 | CYT |
| PFREUD_13660 | recN        | DNA repair protein                                                                                                          | PPA1394 | CYT |
| PFREUD_13670 | ppnK        | Probable inorganic polyphosphate/ATP-NAD kinase (Poly(P)/ATP NAD kinase)                                                    | PPA1395 | CYT |
| PFREUD_13730 | nagD        | Phosphatase                                                                                                                 | PPA1401 | CYT |
| PFREUD_13930 | tyrS        | Tyrosyl-tRNA synthetase (Tyrosine--tRNA ligase) (TyrRS)                                                                     | PPA1404 | CYT |
| PFREUD_13940 | argH        | Argininosuccinate lyase (Arginosuccinase)                                                                                   | PPA1346 | CYT |
| PFREUD_13950 | argR        | Arginine repressor, ArgR                                                                                                    | PPA0586 | CYT |
| PFREUD_13960 | argD        | Acetylornithine and succinylornithine aminotransferase (ACOAT)                                                              | PPA1347 | CYT |
| PFREUD_13970 | argB        | Acetylglutamate kinase                                                                                                      | PPA1348 | CYT |
| PFREUD_13990 | argC        | N-acetyl-gamma-glutamyl-phosphate reductase (AGPR) (N- acetyl-glutamate semialdehyde dehydrogenase) (NAGSA dehydrogenase)   | PPA1350 | CYT |
| PFREUD_14010 | pheT        | Phenylalanyl-tRNA synthetase beta chain (Phenylalanine-- tRNA ligase beta chain) (PheRS)                                    | PPA1408 | CYT |
| PFREUD_14020 | pheS        | Phenylalanyl-tRNA synthetase alpha chain (Phenylalanine--tRNA ligase alpha chain) (PheRS)                                   | PPA1409 | CYT |
| PFREUD_14040 | spoU1       | rRNA methylase                                                                                                              | PPA1410 | CYT |
| PFREUD_14050 | rplT        | 50S ribosomal protein L20                                                                                                   | PPA1412 | CYT |
| PFREUD_14060 | rplM        | 50S ribosomal protein L35                                                                                                   | PPA1413 | CYT |
| PFREUD_14070 | infC        | Translation initiation factor IF-3                                                                                          | PPA1414 | CYT |
| PFREUD_14100 | hisG        | ATP phosphoribosyltransferase                                                                                               | PPA1417 | CYT |
| PFREUD_14110 | hisE        | Phosphoribosyl-ATP pyrophosphohydrolase                                                                                     | PPA1418 | CYT |
| PFREUD_14140 |             | oxidoreductase                                                                                                              | PPA1422 | CYT |
| PFREUD_14230 | dprA        | DNA processing / uptake protein                                                                                             | PPA1429 | CYT |
| PFREUD_14240 | chlI        | Magnesium chelatase, subunit ChlI                                                                                           | PPA1430 | CYT |
| PFREUD_14260 |             | Hypothetical protein                                                                                                        | PPA1432 | CYT |
| PFREUD_14270 | rnhB        | Ribonuclease HII                                                                                                            | PPA1433 | CYT |
| PFREUD_14290 | rplS        | 50S ribosomal protein L19                                                                                                   | PPA1435 | CYT |
| PFREUD_14300 | sdhB3       | Succinate dehydrogenase                                                                                                     | PPA1437 | CYT |
| PFREUD_14340 | trmD        | tRNA (guanine-N1-)-methyltransferase / S- adenosyl-L-methionine:tRNA (guanine-N1-)- methyltransferase                       | PPA1440 | CYT |
| PFREUD_14350 | rimM        | 16S rRNA processing protein                                                                                                 | PPA1441 | CYT |
| PFREUD_14360 |             | Hypothetical protein                                                                                                        | PPA1442 | CYT |
| PFREUD_14380 |             | Metallo-dependent hydrolases, subgroup A                                                                                    | PPA1444 | CYT |
| PFREUD_14390 | ffh         | GTP binding signal recognition particle protein                                                                             | PPA1445 | CYT |
| PFREUD_14440 | mutM3       | Formamidopyrimidine-DNA glycosylase (Fapy-DNA glycosylase) (DNA-(apurinic or apyrimidinic site) lyase mutM) (AP lyase mutM) | PPA1451 | CYT |
| PFREUD_14470 |             | Hypothetical protein                                                                                                        | PPA1453 | CYT |
| PFREUD_14480 | coaD        | Phosphopantetheine adenyltransferase (Pantetheine- phosphate adenyltransferase) (PPAT) (Dephospho-CoA pyrophosphorylase)    | PPA1463 | CYT |
| PFREUD_14490 |             | Methylase                                                                                                                   | PPA1464 | CYT |
| PFREUD_14500 |             | Hypothetical protein                                                                                                        | PPA1465 | CYT |

|              |             |                                                                                                                                                                                           |         |     |
|--------------|-------------|-------------------------------------------------------------------------------------------------------------------------------------------------------------------------------------------|---------|-----|
| PFREUD_14510 | recG        | ATP-dependent DNA helicase RecG                                                                                                                                                           | PPA1466 | CYT |
| PFREUD_14530 |             | Beta-lactamase-like:RNA-metabolising metallo- beta-lactamase                                                                                                                              | PPA1467 | CYT |
| PFREUD_14560 | dapB        | Dihydrodipicolinate reductase (DHPR)                                                                                                                                                      | PPA1470 | CYT |
| PFREUD_14570 | pnpA        | Polyribonucleotide nucleotidyltransferase (Polynucleotide phosphorylase) (PNPase) (Guanosine pentaphosphate synthetase)                                                                   | PPA1471 | CYT |
| PFREUD_14580 | rpsO        | 30S ribosomal protein S15                                                                                                                                                                 | PPA1472 | CYT |
| PFREUD_14600 | glpK        | Glycerol kinase (ATP:glycerol 3- phosphotransferase) (Glycerokinase) (GK)                                                                                                                 | PPA2304 | CYT |
| PFREUD_14620 | truB        | tRNA pseudouridine synthase B (tRNA pseudouridine 55 synthase)                                                                                                                            | PPA1478 | CYT |
| PFREUD_14630 | rbfA        | Ribosome-binding factor A                                                                                                                                                                 | PPA1489 | CYT |
| PFREUD_14640 | infB        | Translation initiation factor IF-2                                                                                                                                                        | PPA1493 | CYT |
| PFREUD_14660 | nusA        | Transcription termination/ antitermination factor NusA                                                                                                                                    | PPA1494 | CYT |
| PFREUD_14670 |             | Hypothetical protein                                                                                                                                                                      | PPA1495 | CYT |
| PFREUD_14690 | proS        | Prolyl-tRNA synthetase (Proline--tRNA ligase) (ProRS)                                                                                                                                     | PPA1499 | CYT |
| PFREUD_14700 |             | Acetyltransferase family protein                                                                                                                                                          | PPA1505 | CYT |
| PFREUD_14710 | ispG        | 4-hydroxy-3-methylbut-2-en-1-yl diphosphate synthase (1- hydroxy-2-methyl-2-(E)-butenyl 4-diphosphate synthase)                                                                           | PPA1506 | CYT |
| PFREUD_14720 | dxr         | 1-deoxy-D-xylulose 5-phosphate reductoisomerase (DXP reductoisomerase) (1-deoxyxylulose-5-phosphate reductoisomerase) (2-C- methyl-D-erythritol 4-phosphate synthase)                     | PPA1510 | CYT |
| PFREUD_14730 |             | Hypothetical protein                                                                                                                                                                      | PPA1514 | CYT |
| PFREUD_14750 | frr         | Ribosome recycling factor (Ribosome-releasing factor) (RRF)                                                                                                                               | PPA1518 | CYT |
| PFREUD_14760 | pyrH        | Uridylate kinase PyrH                                                                                                                                                                     | PPA1519 | CYT |
| PFREUD_14770 | tsf         | Elongation factor Ts (EF-Ts)                                                                                                                                                              | PPA1520 | CYT |
| PFREUD_14780 | rpsB        | 30S ribosomal protein S2                                                                                                                                                                  | PPA1521 | CYT |
| PFREUD_14800 | xerC        | Integrase/recombinase                                                                                                                                                                     | PPA1522 | CYT |
| PFREUD_14810 | def         | Polypeptide deformylase                                                                                                                                                                   | PPA1525 | CYT |
| PFREUD_14820 | spoU2       | RRNA methylase family protein (TRNA/rRNA methyltransferase)                                                                                                                               | PPA1526 | CYT |
| PFREUD_14840 | PPA1530     | ABC transporter ATP-binding protein                                                                                                                                                       | PPA1530 | CYT |
| PFREUD_14850 |             | Hypothetical protein                                                                                                                                                                      | PPA1531 | CYT |
| PFREUD_14860 | inhA        | Enoyl-[acyl-carrier-protein] reductase (NADH)                                                                                                                                             | PPA1532 | CYT |
| PFREUD_14870 | fabG        | 3-oxoacyl-[acyl-carrier protein] reductase                                                                                                                                                | PPA1533 | CYT |
| PFREUD_14890 | myrA        | resistance protein                                                                                                                                                                        | PPA1536 | CYT |
| PFREUD_14910 |             | ABC transporter ATP binding protein                                                                                                                                                       | PPA1538 | CYT |
| PFREUD_14930 | nifU1       | Nitrogen-fixing NifU-like                                                                                                                                                                 | PPA1544 | CYT |
| PFREUD_14940 | sufS        | Cysteine desulphurases, SufS                                                                                                                                                              | PPA1545 | CYT |
| PFREUD_14950 | sufC        | ABC-type transport system involved in Fe-S cluster assembly, ATPase component, SufC                                                                                                       | PPA1546 | CYT |
| PFREUD_14960 |             | Dioxygenase                                                                                                                                                                               | PPA1547 | CYT |
| PFREUD_14970 | sufD        | FeS assembly protein SufD                                                                                                                                                                 | PPA1548 | CYT |
| PFREUD_14980 | sufB        | FeS assembly protein SufB                                                                                                                                                                 | PPA1549 | CYT |
| PFREUD_14990 | arsR4       | Transcriptional regulator, ArsR family                                                                                                                                                    | PPA1550 | CYT |
| PFREUD_15030 | pdxT        | Glutamine amidotransferase subunit pdxT (Glutamine amidotransferase glutaminase subunit pdxT)                                                                                             | PPA0966 | CYT |
| PFREUD_15040 | pdxS        | Pyridoxal biosynthesis lyase pdxS                                                                                                                                                         | PPA0965 | CYT |
| PFREUD_15050 |             | Transcriptional regulator                                                                                                                                                                 | PPA0964 | CYT |
| PFREUD_15060 | zwf         | Glucose-6-phosphate 1-dehydrogenase                                                                                                                                                       | PPA1563 | CYT |
| PFREUD_15070 | opcA        | glucose 6-phosphate dehydrogenase effector OpcA                                                                                                                                           | PPA1564 | CYT |
| PFREUD_15080 | devB        | 6-phosphogluconolactonase                                                                                                                                                                 | PPA1565 | CYT |
| PFREUD_15090 |             | electron transport protein                                                                                                                                                                | PPA0820 | CYT |
| PFREUD_15110 | tpi1        | triosephosphate isomerase 1                                                                                                                                                               | PPA0818 | CYT |
| PFREUD_15120 | pgk         | Phosphoglycerate kinase                                                                                                                                                                   | PPA0817 | CYT |
| PFREUD_15130 | gap         | Glyceraldehyde-3-phosphate dehydrogenase / erythrose 4 phosphate dehydrogenase                                                                                                            | PPA0816 | CYT |
| PFREUD_15170 |             | Hypothetical protein                                                                                                                                                                      | PPA0815 | CYT |
| PFREUD_15180 |             | Hypothetical protein                                                                                                                                                                      | PPA0814 | CYT |
| PFREUD_15190 |             | ATPase                                                                                                                                                                                    | PPA0813 | CYT |
| PFREUD_15200 | uvrC        | UvrABC system protein C (Protein uvrC) (Excinuclease ABC subunit C)                                                                                                                       | PPA0812 | CYT |
| PFREUD_15220 |             | two-component response regulator                                                                                                                                                          | PPA0926 | CYT |
| PFREUD_15230 |             | ABC transporter, ATP-binding protein                                                                                                                                                      | PPA0927 | CYT |
| PFREUD_15260 | uvrA3       | UvrABC system protein A (UvrA protein) (Excinuclease ABC subunit A)                                                                                                                       | PPA0807 | CYT |
| PFREUD_15270 |             | Hypothetical protein                                                                                                                                                                      | PPA0806 | CYT |
| PFREUD_15280 |             | Beta-lactamase-like                                                                                                                                                                       | PPA0805 | CYT |
| PFREUD_15300 | uvrB        | UvrABC system protein B (Protein uvrB) (Excinuclease ABC subunit B)                                                                                                                       | PPA0803 | CYT |
| PFREUD_15310 | coaE        | Dephospho-CoA kinase (Dephosphocoenzyme A kinase)                                                                                                                                         | PPA0785 | CYT |
| PFREUD_15330 | rpsA        | 30S ribosomal protein S1                                                                                                                                                                  | PPA0778 | CYT |
| PFREUD_15340 | gab         | Aldehyde dehydrogenase (Succinate-semialdehyde dehydrogenase) (NAD-dependent aldehyde dehydrogenase)                                                                                      | PPA0079 | CYT |
| PFREUD_15360 | polA        | Putative DNA polymerase I                                                                                                                                                                 | PPA0774 | CYT |
| PFREUD_15370 |             | two-component system response regulator                                                                                                                                                   | PPA0772 | CYT |
| PFREUD_15390 | pyk1        | Pyruvate kinase 1                                                                                                                                                                         | PPA0769 | CYT |
| PFREUD_15400 | rluA        | Pseudouridylate synthase, Uncharacterized RNA pseudouridine synthase                                                                                                                      | PPA0768 | CYT |
| PFREUD_15420 | dskA        | Transcriptional regulators, TraR/DksA family                                                                                                                                              | PPA0766 | CYT |
| PFREUD_15430 |             | Hypothetical protein                                                                                                                                                                      | PPA0765 | CYT |
| PFREUD_15450 |             | Hypothetical protein                                                                                                                                                                      | PPA0763 | CYT |
| PFREUD_15460 |             | Hypothetical protein                                                                                                                                                                      | PPA0762 | CYT |
| PFREUD_15470 | ftsZ        | Cell division protein FtsZ                                                                                                                                                                | PPA0761 | CYT |
| PFREUD_15490 | murC        | UDP-N-acetylmuramate--L-alanine ligase (UDP-N- acetylmuramoyl-L-alanine synthetase)                                                                                                       | PPA0759 | CYT |
| PFREUD_15500 | murG        | UDP-N-acetylglucosamine--N-acetylmuramyl- (pentapeptide) pyrophosphoryl-undecaprenol N- acetylglucosamine transferase (Undecaprenyl-PP-MurNAc- pentapeptide-UDPGlcNAc GlcNAc transferase) | PPA0758 | CYT |
| PFREUD_15520 | murD        | UDP-N-acetylmuramoylalanine--D-glutamate ligase (UDP-N- acetylmuramoyl-L-alanyl-D-glutamate synthetase) (D- glutamic acid- adding enzyme)                                                 | PPA0756 | CYT |
| PFREUD_15540 | murF        | UDP-N-acetylmuramoyl-tripeptide--D-alanyl-D- alanine ligase (UDP- MurNAc-pentapeptide synthetase) (D- alanyl- D-alanine-adding enzyme)                                                    | PPA0754 | CYT |
| PFREUD_15550 | murE        | UDP-N-acetylmuramoylalanyl-D-glutamate--2,6- diaminopimelate ligase (UDP-N-acetylmuramyl-tripeptide synthetase) (Meso- diaminopimelate-adding enzyme) (UDP- MurNAc-tripeptide synthetase) | PPA0753 | CYT |
| PFREUD_15560 | ftsI        | Cell division protein FtsI (penicillin-binding protein 2) (Peptidoglycan glycosyltransferase)                                                                                             | PPA0752 | CYT |
| PFREUD_15580 | mraW        | S-adenosyl-L-methionine-dependent methyltransferase mraW                                                                                                                                  | PPA0750 | CYT |
| PFREUD_15590 | mraZ        | Protein mraZ                                                                                                                                                                              | PPA0749 | CYT |
| PFREUD_15640 | dnaE2       | DNA polymerase III alpha subunit                                                                                                                                                          | PPA1650 | CYT |
| PFREUD_15660 |             | Helicase protein                                                                                                                                                                          | PPA0733 | CYT |
| PFREUD_15680 |             | Farnesyltranstransferase / Geranylgeranyl pyrophosphate synthase                                                                                                                          | PPA0732 | CYT |
| PFREUD_15710 |             | Zn-dependent hydrolase, beta-lactamase fold                                                                                                                                               | PPA0727 | CYT |
| PFREUD_15720 | aroH        | Phospho-2-dehydro-3-deoxyheptonate aldolase                                                                                                                                               | PPA0726 | CYT |
| PFREUD_15740 | plsC3       | Acyltransferase PlsC                                                                                                                                                                      | PPA0724 | CYT |
| PFREUD_15770 | ppiA (cypB) | Probable peptidyl-prolyl cis-trans isomerase A                                                                                                                                            | PPA0718 | CYT |
| PFREUD_15850 | guaB3       | Inosine-5 -monophosphate dehydrogenase (IMP dehydrogenase) (IMPDH) (IMPD) / GMP reductase                                                                                                 | PPA0708 | CYT |

|              |                        |                                                                                                                                                                                                             |         |     |
|--------------|------------------------|-------------------------------------------------------------------------------------------------------------------------------------------------------------------------------------------------------------|---------|-----|
| PFREUD_15860 |                        | HesB protein                                                                                                                                                                                                | PPA0700 | CYT |
| PFREUD_15880 |                        | Hypothetical protein                                                                                                                                                                                        | PPA0699 | CYT |
| PFREUD_15890 | pspA                   | Phage shock protein A                                                                                                                                                                                       | PPA0698 | CYT |
| PFREUD_15920 |                        | Hypothetical protein                                                                                                                                                                                        | PPA0696 | CYT |
| PFREUD_15930 | gcvT1                  | Glycine cleavage system T protein, aminomethyltransferase                                                                                                                                                   | PPA0744 | CYT |
| PFREUD_15960 |                        | ABC transporter                                                                                                                                                                                             | PPA0682 | CYT |
| PFREUD_15970 |                        | Glutamine synthetase                                                                                                                                                                                        | PPA0671 | CYT |
| PFREUD_15990 |                        | Tetracycline repressor protein, TetR-family transcriptional regulator                                                                                                                                       | PPA1406 | CYT |
| PFREUD_16010 | glnE                   | Glutamate-ammonia-ligase adenyllyltransferase ([Glutamate--ammonia-ligase] adenyllyltransferase) (Glutamine-synthetase adenyllyltransferase) (ATase)                                                        | PPA0666 | CYT |
| PFREUD_16020 |                        | Hypothetical protein                                                                                                                                                                                        | PPA0665 | CYT |
| PFREUD_16030 | glnA                   | Glutamine synthetase                                                                                                                                                                                        | PPA0664 | CYT |
| PFREUD_16060 | map, mapB              | Methionine aminopeptidase (MAP) (Peptidase M)                                                                                                                                                               | PPA0661 | CYT |
| PFREUD_16080 |                        | Hypothetical protein                                                                                                                                                                                        | PPA0651 | CYT |
| PFREUD_16090 | pepP                   | Xaa-Pro aminopeptidase I                                                                                                                                                                                    | PPA0650 | CYT |
| PFREUD_16110 | citE                   | Citrate lyase beta chain (Citrate beta chain) (Citrate(Pro-3S)-lyase beta chain)                                                                                                                            | PPA1919 | CYT |
| PFREUD_16120 | mgtE                   | magnesium (Mg2+) transporter                                                                                                                                                                                | PPA0647 | CYT |
| PFREUD_16140 | PF47                   | Protein mrp homolog (ATP-binding protein)                                                                                                                                                                   | PPA0645 | CYT |
| PFREUD_16150 | tatB                   | Sec-independent protein translocase protein TatB precursor                                                                                                                                                  | PPA0643 | CYT |
| PFREUD_16160 | dapA                   | Dihydrodipicolinate synthase                                                                                                                                                                                | PPA0642 | CYT |
| PFREUD_16170 |                        | Methyltransferase                                                                                                                                                                                           | PPA0641 | CYT |
| PFREUD_16180 | glgC                   | Glucose-1-phosphate adenyllyltransferase (ADP- glucose synthase) (ADP-glucose pyrophosphorylase) (ADPGlc PPase)                                                                                             | PPA0640 | CYT |
| PFREUD_16190 | glgA                   | glycosyltransferase (glycogen synthase)                                                                                                                                                                     | PPA0639 | CYT |
| PFREUD_16200 |                        | Hypothetical protein                                                                                                                                                                                        | PPA0638 | CYT |
| PFREUD_16240 | dapE2                  | Succinyl-diaminopimelate desuccinylase                                                                                                                                                                      | PPA0636 | CYT |
| PFREUD_16250 | dapD                   | 2,3,4,5-tetrahydropyridine-2,6-dicarboxylate N- succinyltransferase                                                                                                                                         | PPA0630 | CYT |
| PFREUD_16270 |                        | aminotransferase                                                                                                                                                                                            | PPA0628 | CYT |
| PFREUD_16280 | fdxA                   | Ferredoxin                                                                                                                                                                                                  | PPA0627 | CYT |
| PFREUD_16290 | gya                    | Glyoxylate reductase                                                                                                                                                                                        | PPA2251 | CYT |
| PFREUD_16300 | fumC                   | Fumarate hydratase, class-II                                                                                                                                                                                | PPA2292 | CYT |
| PFREUD_16320 | aspA1                  | Aspartate ammonia-lyase (Aspartase)                                                                                                                                                                         | PPA0094 | CYT |
| PFREUD_16370 |                        | Acetyltransferase                                                                                                                                                                                           | PPA0624 | CYT |
| PFREUD_16380 | gpt                    | Putative purine phosphoribosyltransferase                                                                                                                                                                   | PPA0623 | CYT |
| PFREUD_16400 |                        | Hypothetical protein                                                                                                                                                                                        | PPA1744 | CYT |
| PFREUD_16460 |                        | Hypothetical protein                                                                                                                                                                                        | PPA0587 | CYT |
| PFREUD_16490 | glxK/garK              | Glycerate kinase GlxK/GarK                                                                                                                                                                                  | PPA2299 | CYT |
| PFREUD_16550 | thiG                   | Thiazole biosynthesis family protein                                                                                                                                                                        | PPA0519 | CYT |
| PFREUD_16570 | dadA1                  | DadA, Glycine/D-amino acid oxidases                                                                                                                                                                         | PPA0520 | CYT |
| PFREUD_16930 | ychF                   | GTPase YchF                                                                                                                                                                                                 | PPA0575 | CYT |
| PFREUD_16940 | apeB                   | Aminopeptidase                                                                                                                                                                                              | PPA0574 | CYT |
| PFREUD_16970 | ispH (lytB)            | 4-hydroxy-3-methylbut-2-enyl diphosphate reductase                                                                                                                                                          | PPA0572 | CYT |
| PFREUD_16980 | xseA                   | Exodeoxyribonuclease VII large subunit                                                                                                                                                                      | PPA0569 | CYT |
| PFREUD_17010 | uppS                   | Undecaprenyl pyrophosphate synthase (di- trans,poly-cis-decaprenylcistransferase)                                                                                                                           | PPA0564 | CYT |
| PFREUD_17050 | greA                   | Transcription elongation factor GreA                                                                                                                                                                        | PPA0561 | CYT |
| PFREUD_17060 |                        | Hypothetical membrane protein                                                                                                                                                                               | PPA0920 | CYT |
| PFREUD_17070 |                        | Hypothetical protein                                                                                                                                                                                        | PPA0560 | CYT |
| PFREUD_17090 | ung                    | Uracil-DNA glycosylase                                                                                                                                                                                      | PPA0558 | CYT |
| PFREUD_17100 | msrA                   | peptide-methionine (S)-S-oxide reductase                                                                                                                                                                    | PPA0556 | CYT |
| PFREUD_17180 | mpg                    | 3-methyladenine DNA glycosylase                                                                                                                                                                             | PPA2247 | CYT |
| PFREUD_17200 |                        | NUDIX hydrolase                                                                                                                                                                                             | PPA0550 | CYT |
| PFREUD_17290 | ppx                    | Ppx/GppA phosphatase family                                                                                                                                                                                 | PPA0548 | CYT |
| PFREUD_17300 |                        | Hypothetical protein                                                                                                                                                                                        | PPA0547 | CYT |
| PFREUD_17320 | eno1                   | Enolase 1                                                                                                                                                                                                   | PPA0545 | CYT |
| PFREUD_17330 |                        | MazG-family transcriptional regulator                                                                                                                                                                       | PPA0543 | CYT |
| PFREUD_17350 | mfd                    | Transcription-repair coupling factor                                                                                                                                                                        | PPA0541 | CYT |
| PFREUD_17370 | pth                    | Peptidyl-tRNA hydrolase (aminoacyl-tRNA hydrolase)                                                                                                                                                          | PPA0536 | CYT |
| PFREUD_17400 | prs                    | Ribose-phosphate pyrophosphokinase                                                                                                                                                                          | PPA0531 | CYT |
| PFREUD_17440 | pyrB                   | Aspartate carbamoyltransferase                                                                                                                                                                              | PPA0997 | CYT |
| PFREUD_17460 | ispE                   | 4-diphosphocytidyl-2-C-methyl-D-erythritol kinase (CMK) (4-(cytidine-5 -diphospho)-2-C-methyl-D- erythritol kinase)                                                                                         | PPA0527 | CYT |
| PFREUD_17470 | ksgA                   | Dimethyladenosine transferase (S- adenosylmethionine-6-N , N -adenosyl(rRNA) dimethyltransferase) (16S rRNA dimethylase) (High level kasugamycin resistance protein ksgA) (Kasugamycin dimethyltransferase) | PPA0526 | CYT |
| PFREUD_17480 | tatD                   | DNase                                                                                                                                                                                                       | PPA0525 | CYT |
| PFREUD_17490 |                        | Methylase                                                                                                                                                                                                   | PPA0524 | CYT |
| PFREUD_17610 | gdh                    | glutamate dehydrogenase (NAD(P)-glutamate dehydrogenase)                                                                                                                                                    | PPA1513 | CYT |
| PFREUD_17840 | dnaK1                  | Chaperone protein dnaK 1 (Heat shock protein 70 1) (Heat shock 70 kDa protein 1) (HSP70 1)                                                                                                                  | PPA2040 | CYT |
| PFREUD_17920 | clpB 2                 | Chaperone clpB 2 (ATP-dependent Clp protease B2) (Clp chaperone)                                                                                                                                            | PPA2021 | CYT |
| PFREUD_17990 | rimJ                   | ribosomal-protein-alanine acetyltransferase                                                                                                                                                                 | PPA0495 | CYT |
| PFREUD_18000 | moeA1                  | Molybdenum cofactor synthesis domain                                                                                                                                                                        | PPA0494 | CYT |
| PFREUD_18070 | ugpA                   | UTP--glucose-1-phosphate uridylyltransferase                                                                                                                                                                | PPA0489 | CYT |
| PFREUD_18140 | trxA4                  | thiredoxine                                                                                                                                                                                                 | PPA0487 | CYT |
| PFREUD_18150 | dtxR                   | Iron-dependent repressor                                                                                                                                                                                    | PPA0485 | CYT |
| PFREUD_18160 | serC                   | Phosphoserine aminotransferase (phosphoserine transaminase)                                                                                                                                                 | PPA0483 | CYT |
| PFREUD_18200 |                        | Hypothetical protein                                                                                                                                                                                        | PPA0478 | CYT |
| PFREUD_18210 | cspB                   | Cold shock protein                                                                                                                                                                                          | PPA0477 | CYT |
| PFREUD_18230 |                        | Hypothetical protein                                                                                                                                                                                        | PPA0474 | CYT |
| PFREUD_18470 | groL2 (groEL2) (hsp60) | 60 kDa chaperonin 2 (Protein Cpn60 2) (groEL protein 2) (Heat shock protein 60 2)                                                                                                                           | PPA0453 | CYT |
| PFREUD_18490 | mana                   | Phosphomannose isomerase                                                                                                                                                                                    | PPA0451 | CYT |
| PFREUD_18570 | sdaA                   | L-serine dehydratase ( L-serine ammonia-lyase)                                                                                                                                                              | PPA0396 | CYT |
| PFREUD_18580 |                        | ABC transporter ATP-binding protein                                                                                                                                                                         | PPA0395 | CYT |
| PFREUD_18600 |                        | Hypothetical protein                                                                                                                                                                                        | PPA0386 | CYT |
| PFREUD_18630 |                        | Hypothetical protein                                                                                                                                                                                        | PPA0169 | CYT |
| PFREUD_18640 |                        | iron-sulfur protein                                                                                                                                                                                         | PPA0168 | CYT |
| PFREUD_18650 |                        | Oxidoreductase                                                                                                                                                                                              | PPA0167 | CYT |
| PFREUD_18680 | cysS2                  | Cysteinylyl-tRNA synthetase (Cysteine--tRNA ligase)                                                                                                                                                         | PPA0384 | CYT |
| PFREUD_18690 |                        | tRNA/rRNA methyltransferase                                                                                                                                                                                 | PPA0383 | CYT |
| PFREUD_18730 | ansA                   | L-asparaginase I                                                                                                                                                                                            | PPA0367 | CYT |
| PFREUD_18740 | glyA                   | Glycine hydroxymethyltransferase precursor                                                                                                                                                                  | PPA0369 | CYT |
| PFREUD_18750 | ispF                   | 2-C-methyl-D-erythritol 2,4-cyclodiphosphate synthase (MECP5) (MECDP-synthase)                                                                                                                              | PPA0354 | CYT |
| PFREUD_18760 | ispD                   | 2-C-methyl-D-erythritol 4-phosphate cytidylyltransferase (4-diphosphocytidyl-2C-methyl-D- erythritol synthase) (MEP cytidylyltransferase) (MCT)                                                             | PPA0353 | CYT |

|              |             |                                                                                                                                                                    |         |     |
|--------------|-------------|--------------------------------------------------------------------------------------------------------------------------------------------------------------------|---------|-----|
| PFREUD_18770 | carD        | transcriptional regulator CarD                                                                                                                                     | PPA0357 | CYT |
| PFREUD_18780 | regX        | Response regulator receiver                                                                                                                                        | PPA0359 | CYT |
| PFREUD_18800 | phoU        | Putative phosphate transport system protein                                                                                                                        | PPA0361 | CYT |
| PFREUD_18810 | gpm2        | phosphoglycerate mutase                                                                                                                                            | PPA0364 | CYT |
| PFREUD_18830 | sdh         | Serine 3-dehydrogenase                                                                                                                                             | PPA0350 | CYT |
| PFREUD_18840 | bccp        | Methylmalonyl-CoA carboxytransferase , 1.3S subunit (Transcarboxylase, 1.3S subunit). 123bp                                                                        | PPA2005 | CYT |
| PFREUD_18850 |             | Hypothetical protein                                                                                                                                               | PPA2006 | CYT |
| PFREUD_18860 | mmdA        | Methylmalonyl-CoA carboxytransferase 12S subunit (EC2.1.3.1) (Transcarboxylase 12S subunit). 610 bp                                                                | PPA2007 | CYT |
| PFREUD_18870 |             | Methylmalonyl-CoA carboxytransferase 5S subunit. (transcarboxylase 5S) 505 bp                                                                                      | PPA2008 | CYT |
| PFREUD_18880 | hemL1       | Glutamate-1-semialdehyde 2,1-aminomutase (GSA) (Glutamate-1-semialdehyde aminotransferase)(GSA-AT)                                                                 | PPA0301 | CYT |
| PFREUD_18910 | hemB        | Delta-aminolevulinic acid dehydratase (Porphobilinogen synthase)                                                                                                   | PPA0302 | CYT |
| PFREUD_18930 | hemY        | Protoporphyrinogen oxidase (PPO) HemY                                                                                                                              | PPA2095 | CYT |
| PFREUD_18940 |             | Fe-S oxidoreductase                                                                                                                                                | PPA2096 | CYT |
| PFREUD_18970 | hemA        | Glutamyl-tRNA reductase                                                                                                                                            | PPA0307 | CYT |
| PFREUD_19030 | iolG1       | iolG1 (Myo-inositol catabolism iolG1 protein) (myo-inositol 2-dehydrogenase)                                                                                       | PPA0469 | CYT |
| PFREUD_19040 | tal2        | Transaldolase 2                                                                                                                                                    | PPA0454 | CYT |
| PFREUD_19050 |             | GntR-family protein transcriptional regulator                                                                                                                      | PPA0455 | CYT |
| PFREUD_19060 | iolC        | iolC (Myo-inositol catabolism iolC protein)                                                                                                                        | PPA0456 | CYT |
| PFREUD_19070 |             | Hypothetical protein                                                                                                                                               | PPA0457 | CYT |
| PFREUD_19080 | iolB        | iolB (Myo-inositol catabolism iolB protein)                                                                                                                        | PPA0458 | CYT |
| PFREUD_19090 | iolD        | iolD (Myo-inositol catabolism iolD protein) (acetolactate synthase protein) (pyruvate:pyruvate acetaldehydetransferase (decarboxylating))                          | PPA0459 | CYT |
| PFREUD_19100 | iolA (msdA) | iolA (Myo-inositol catabolism iolA protein) (Methylmalonic acid semialdehyde dehydrogenase)                                                                        | PPA0461 | CYT |
| PFREUD_19150 | fba1        | Fructose-bisphosphate aldolase class II                                                                                                                            | PPA2011 | CYT |
| PFREUD_19230 | speE        | spermidine synthase                                                                                                                                                | PPA2016 | CYT |
| PFREUD_19280 | purA        | Adenylosuccinate synthetase (IMP--aspartate ligase) (AdSS) (AMPSase)                                                                                               | PPA1994 | CYT |
| PFREUD_19310 | iunH        | Inosine/uridine-preferring nucleoside hydrolase (purine nucleosidase)                                                                                              | PPA2076 | CYT |
| PFREUD_19430 |             | Endoribonuclease L-PSP                                                                                                                                             | PPA0221 | CYT |
| PFREUD_19460 | hslR        | Ribosome-associated heat shock protein implicated in the recycling of the 50S subunit (S4 paralogue)                                                               | PPA0202 | CYT |
| PFREUD_19480 |             | Phosphocarrier, HPr family                                                                                                                                         | PPA0141 | CYT |
| PFREUD_19560 |             | Forkhead-associated protein                                                                                                                                        | PPA0189 | CYT |
| PFREUD_19630 | galK2       | Galactokinase                                                                                                                                                      | PPA2192 | CYT |
| PFREUD_19640 | nifU2       | NifU-like protein                                                                                                                                                  | PPA1678 | CYT |
| PFREUD_19710 | mesJ        | CMP/dCMP deaminase, zinc-binding                                                                                                                                   | PPA2182 | CYT |
| PFREUD_19730 | upp         | Uracil phosphoribosyltransferase (UMP pyrophosphorylase) (UPRTase)                                                                                                 | PPA2184 | CYT |
| PFREUD_19810 | typA        | GTP-binding protein typA/BipA (Tyrosine phosphorylated protein A)                                                                                                  | PPA2003 | CYT |
| PFREUD_19820 | gcvT2       | glycine cleavage T-protein, aminomethyl transferase                                                                                                                | PPA0348 | CYT |
| PFREUD_19830 |             | Hypothetical protein                                                                                                                                               | PPA0347 | CYT |
| PFREUD_19860 | dtb         | D-tyrosyl-tRNA(Tyr) deacylase                                                                                                                                      | PPA0346 | CYT |
| PFREUD_19870 | glnR        | Transcriptional regulatory protein                                                                                                                                 | PPA0344 | CYT |
| PFREUD_19910 | galE3       | UDP-glucose 4-epimerase                                                                                                                                            | PPA0069 | CYT |
| PFREUD_19930 | ppk         | Polyphosphate kinase                                                                                                                                               | PPA0343 | CYT |
| PFREUD_19940 |             | NUDIX hydrolase NTP pyrophosphohydrolases including oxidative damage repair enzymes                                                                                | PPA0342 | CYT |
| PFREUD_19980 | pstB        | Phosphate import ATP-binding protein pstB (Phosphate- transporting ATPase) (ABC phosphate transporter)                                                             | PPA0338 | CYT |
| PFREUD_20050 |             | Pyridine nucleotide-disulphide oxidoreductase                                                                                                                      | PPA0333 | CYT |
| PFREUD_20060 | pgm/fbp     | phosphoglycerate mutase/Fructose-2,6- bisphosphatase                                                                                                               | PPA0324 | CYT |
| PFREUD_20070 | hemD        | Uroporphyrinogen-III synthase HemD                                                                                                                                 | PPA0323 | CYT |
| PFREUD_20090 |             | Delta 1-pyrroline-5-carboxylate reductase                                                                                                                          | PPA0319 | CYT |
| PFREUD_20130 |             | endonuclease                                                                                                                                                       | PPA0315 | CYT |
| PFREUD_20140 |             | Hypothetical protein                                                                                                                                               | PPA0314 | CYT |
| PFREUD_20150 | sms         | DNA repair protein                                                                                                                                                 | PPA0312 | CYT |
| PFREUD_20160 | disA        | DNA integrity scanning protein disA                                                                                                                                | PPA0311 | CYT |
| PFREUD_20170 | mutY        | MutY, A/G-specific DNA glycosylase                                                                                                                                 | PPA0300 | CYT |
| PFREUD_20210 |             | cobalt ABC transporter                                                                                                                                             | PPA0288 | CYT |
| PFREUD_20250 | clpC        | chaperone clpC (Clp-family ATP-binding protease) (ATP-dependent Clp protease ATP-binding subunit)                                                                  | PPA0278 | CYT |
| PFREUD_20260 |             | Lsr2-like protein                                                                                                                                                  | PPA0277 | CYT |
| PFREUD_20270 | folK        | Putative hydroxymethyldihydropteridine pyrophosphokinase                                                                                                           | PPA0273 | CYT |
| PFREUD_20280 | folB        | Dihydroneopterin aldolase                                                                                                                                          | PPA0272 | CYT |
| PFREUD_20290 | folP2       | Dihydropteroate synthase((2-amino-4-hydroxy-7,8- dihydropteridin-6- yl)methyl-diphosphate:4-aminobenzoate 2-amino-4-hydroxydihydropteridine-6-methenyltransferase) | PPA0271 | CYT |
| PFREUD_20310 | folE        | GTP cyclohydrolase I (GTP-CH-I)                                                                                                                                    | PPA0261 | CYT |
| PFREUD_20330 | hpt         | hypoxanthine phosphoribosyltransferase                                                                                                                             | PPA0259 | CYT |
| PFREUD_20340 | tilS        | TRNA(Ile)-lysidine synthetase                                                                                                                                      | PPA0258 | CYT |
| PFREUD_20380 |             | Hypothetical protein                                                                                                                                               | PPA0255 | CYT |
| PFREUD_20390 | sixA        | phosphohistidine phosphatase                                                                                                                                       | PPA0252 | CYT |
| PFREUD_20440 | mao         | flavin-containing amine oxidase                                                                                                                                    | PPA0250 | CYT |
| PFREUD_20530 | dnaX        | DNA polymerase III, delta prime subunit                                                                                                                            | PPA0244 | CYT |
| PFREUD_20540 | tmk         | Thymidylate kinase (dTMP kinase)                                                                                                                                   | PPA0243 | CYT |
| PFREUD_20550 |             | Hypothetical protein                                                                                                                                               | PPA0242 | CYT |
| PFREUD_20560 | topA        | DNA topoisomerase I                                                                                                                                                | PPA0241 | CYT |
| PFREUD_20570 |             | transferase                                                                                                                                                        | PPA0238 | CYT |
| PFREUD_20600 | dmsB        | Anaerobic dimethyl sulfoxide reductase, chain B                                                                                                                    | PPA0516 | CYT |
| PFREUD_20610 | dmsA        | Anaerobic dimethyl sulfoxide reductase chain A                                                                                                                     | PPA0517 | CYT |
| PFREUD_20710 |             | secretory protein                                                                                                                                                  | PPA0230 | CYT |
| PFREUD_20720 |             | Hypothetical protein                                                                                                                                               | PPA0229 | CYT |
| PFREUD_20770 |             | Hypothetical protein                                                                                                                                               | PPA2173 | CYT |
| PFREUD_20800 |             | Hypothetical protein                                                                                                                                               | PPA2243 | CYT |
| PFREUD_20810 | dnaB        | Replicative DNA helicase                                                                                                                                           | PPA2244 | CYT |
| PFREUD_20840 | namA        | NADH-dependent flavin oxidoreductase                                                                                                                               | PPA2118 | CYT |
| PFREUD_21320 | merA        | Pyridine nucleotide-disulphide oxidoreductase                                                                                                                      | PPA1981 | CYT |
| PFREUD_21390 | modB        | DNA methylase ( site-specific DNA- methyltransferase adenine-specific, Putative type III restriction-modification system)                                          | PPA1611 | CYT |
| PFREUD_21400 |             | Putative type III restriction enzyme                                                                                                                               | PPA1612 | CYT |
| PFREUD_21440 | ribH        | 6,7-dimethyl-8-ribityllumazine synthase (Riboflavin synthase beta chain)                                                                                           | PPA1749 | CYT |
| PFREUD_21450 | ribAB       | GTP cyclohydrolase II protein, Riboflavin biosynthesis protein                                                                                                     | PPA1750 | CYT |
| PFREUD_21460 | ribC (ribE) | Riboflavin synthase alpha chain                                                                                                                                    | PPA1751 | CYT |
| PFREUD_21470 | ribD        | Riboflavin-specific deaminase (diaminohydroxyphosphoribosylaminopyrimidine deaminase) (5- amino-6-(5-phosphoribosylamino)uracil reductase)                         | PPA1752 | CYT |
| PFREUD_21660 | rpiB3       | Ribose-5-phosphate isomerase 3                                                                                                                                     | PPA1624 | CYT |
| PFREUD_21700 |             | Hypothetical fusion protein                                                                                                                                        | PPA1172 | CYT |
| PFREUD_21760 | moaE2, moaE | Molybdopterin synthase MoaE, Molybdenum cofactor biosynthesis protein E 2                                                                                          | PPA0500 | CYT |
| PFREUD_21810 | moaB (mog)  | Molybdenum cofactor biosynthesis protein                                                                                                                           | PPA0513 | CYT |

|              |            |                                                                                  |         |          |
|--------------|------------|----------------------------------------------------------------------------------|---------|----------|
| PFREUD_21980 |            | Two component transcriptional regulator, LuxR family                             | PPA0055 | CYT      |
| PFREUD_22110 |            | Hypothetical protein                                                             | PPA0040 | CYT      |
| PFREUD_22160 |            | Metal binding protein                                                            | PPA0443 | CYT      |
| PFREUD_22330 |            | Aldose 1-epimerase                                                               | PPA2052 | CYT      |
| PFREUD_22340 | uvrA4      | Excinuclease ATPase subunit UvrA                                                 | PPA0877 | CYT      |
| PFREUD_22360 | tkt        | Transketolase                                                                    | PPA2318 | CYT      |
| PFREUD_22370 | araB       | L-ribulokinase                                                                   | PPA2319 | CYT      |
| PFREUD_22380 | araM       | L-arabinose utilization protein                                                  | PPA2320 | CYT      |
| PFREUD_22400 | araB, xylB | Carbohydrate kinase                                                              | PPA2321 | CYT      |
| PFREUD_22410 | araL       | L-arabinose operon protein, hydrolase                                            | PPA2322 | CYT      |
| PFREUD_22430 | rpiB2      | Ribose-5-phosphate isomerase 2                                                   | PPA2324 | CYT      |
| PFREUD_22450 | deoR3      | Putative regulatory protein, DeoR family                                         | PPA2326 | CYT      |
| PFREUD_22470 | dhaK/dhaL  | Dihydroxyacetone kinase                                                          | PPA0622 | CYT      |
| PFREUD_22780 | hsp20 1    | Heat shock protein 20 1 (20 kDa chaperone 1)                                     | PPA0737 | CYT      |
| PFREUD_22840 |            | hexulose-6-phosphate isomerase                                                   | PPA0881 | CYT      |
| PFREUD_22860 | pdxA2      | 4-hydroxythreonine-4-phosphate dehydrogenase                                     | PPA0296 | CYT      |
| PFREUD_22890 | nadE       | Glutamine-dependent NAD(+) synthetase                                            | PPA2266 | CYT      |
| PFREUD_22910 |            | polar amino acid ABC transporter, ATP binding component                          | PPA0600 | CYT      |
| PFREUD_22960 | pncA       | pyrazinamidase/nicotinamidase                                                    | PPA0993 | CYT      |
| PFREUD_23000 |            | Putative long-chain-fatty-acid--CoA ligase/synthetase                            | PPA2234 | CYT      |
| PFREUD_23010 | nfo        | endonuclease IV (deoxyribonuclease IV (phage-T4- induced))                       | PPA2235 | CYT      |
| PFREUD_23130 | iolH       | iolH (Myo-inositol catabolism IolH protein) (isomerase:epimerase)                | PPA0465 | CYT      |
| PFREUD_23150 | pf667      | Carboxylic ester hydrolase                                                       | PPA0594 | CYT      |
| PFREUD_23160 | ugpQ2      | Glycerophosphoryl diester phosphodiesterase                                      | PPA1839 | CYT      |
| PFREUD_23190 |            | sugar (xylose) phosphate isomerase/epimerase                                     | PPA0464 | CYT      |
| PFREUD_23200 |            | Inositol 2-dehydrogenase                                                         | PPA0463 | CYT      |
| PFREUD_23210 | lacI4      | Transcriptional regulator, LacI family (HTH-type transcriptional regulator degA) | PPA0462 | CYT      |
| PFREUD_23300 | proV       | ABC-type glycine betaine transport, ATP-binding protein                          | PPA0407 | CYT      |
| PFREUD_23440 | rpII       | 50S ribosomal protein L9                                                         | PPA2227 | CYT      |
| PFREUD_23450 | rpsR       | 30S ribosomal protein S18                                                        | PPA2228 | CYT      |
| PFREUD_23460 | ssb        | Single-strand binding protein                                                    | PPA2229 | CYT      |
| PFREUD_23470 | rpsF       | 30S ribosomal protein S6                                                         | PPA2230 | CYT      |
| PFREUD_23520 |            | Hypothetical protein                                                             | PPA2231 | CYT      |
| PFREUD_23650 |            | Hypothetical protein                                                             | PPA0125 | CYT      |
| PFREUD_23740 | aglA       | Alpha-1,4-glucosidase                                                            | PPA1630 | CYT      |
| PFREUD_23780 | acs        | Fatty-acyl-CoA synthase                                                          | PPA1724 | CYT      |
| PFREUD_23800 | katA       | Catalase                                                                         | PPA0097 | CYT      |
| PFREUD_23890 | fbA2       | Fructose-bisphosphate aldolase class I                                           | PPA2024 | CYT      |
| PFREUD_23910 | glT1A1     | Citrate synthase                                                                 | PPA2272 | CYT      |
| PFREUD_23920 | yghZ       | Oxidoreductase                                                                   | PPA0994 | CYT      |
| PFREUD_24000 | fepC1      | ABC transporter, iron transport ATPase protein                                   | PPA0658 | CYT      |
| PFREUD_24040 | pcnB       | tRNA nucleotidyltransferase PcnB                                                 | PPA2301 | CYT      |
| PFREUD_24080 | gpm1       | phosphoglycerate mutase/fructose-2,6- bisphosphatase                             | PPA0809 | CYT      |
| PFREUD_24100 | trxB       | Thioredoxin reductase                                                            | PPA2309 | CYT      |
| PFREUD_24120 | osmC       | OsmC protein                                                                     | PPA2313 | CYT      |
| PFREUD_24140 | parB       | chromosome partitioning protein                                                  | PPA2341 | CYT      |
| PFREUD_24220 |            | Hypothetical protein                                                             | PPA2353 | CYT      |
| PFREUD_00300 | iolT2      | iolT2 (myo-inositol transporter iolT2)                                           | PPA0467 | MEMBRANE |
| PFREUD_00380 | cycA2      | D-serine/D-alanine/glycine transporter                                           | PPA2269 | MEMBRANE |
| PFREUD_00960 | hflC1      | Stomatin/prohibitin homolog                                                      | PPA1973 | MEMBRANE |
| PFREUD_01640 |            | two component sensor kinase                                                      | PPA2027 | MEMBRANE |
| PFREUD_01730 | cydB       | Cytochrome d ubiquinol oxidase, subunit II                                       | PPA0175 | MEMBRANE |
| PFREUD_02100 |            | ABC-type transporter                                                             | PPA0179 | MEMBRANE |
| PFREUD_02230 | whiP       | Hypothetical transmembrane protein                                               | PPA0182 | MEMBRANE |
| PFREUD_02360 | galP       | Sodium:galactoside symporter                                                     | PPA2331 | MEMBRANE |
| PFREUD_02650 |            | sugar transporter                                                                | PPA1822 | MEMBRANE |
| PFREUD_03190 | matE       | Multi antimicrobial extrusion protein MatE                                       | PPA2259 | MEMBRANE |
| PFREUD_03280 |            | ABC-type transport systems, periplasmic component                                | PPA1758 | MEMBRANE |
| PFREUD_03300 |            | ABC transporter, permease protein                                                | PPA1760 | MEMBRANE |
| PFREUD_03400 | aroP       | Aromatic amino acid transport protein aroP                                       | PPA1069 | MEMBRANE |
| PFREUD_03410 |            | Cation-efflux transport protein                                                  | PPA1228 | MEMBRANE |
| PFREUD_03570 | PPA1043    | Anaerobic C4-dicarboxylate transporter                                           | PPA1043 | MEMBRANE |
| PFREUD_03780 |            | Hypothetical membrane protein                                                    | PPA0093 | MEMBRANE |
| PFREUD_03890 | mviN       | Conserved membrane protein, MviN-like protein                                    | PPA2147 | MEMBRANE |
| PFREUD_03930 |            | aminoacid permease                                                               | PPA0177 | MEMBRANE |
| PFREUD_03990 |            | transport protein                                                                | PPA2034 | MEMBRANE |
| PFREUD_04230 |            | Hypothetical protein                                                             | PPA2140 | MEMBRANE |
| PFREUD_04490 | PPA2042    | Putative low-affinity phosphate transport protein                                | PPA2042 | MEMBRANE |
| PFREUD_04500 |            | Hypothetical protein                                                             | PPA2041 | MEMBRANE |
| PFREUD_04570 | cbiQ2      | Cobalt transport protein CbiQ                                                    | PPA0433 | MEMBRANE |
| PFREUD_04590 | cbiM       | Cobalt transport protein CbiM                                                    | PPA0430 | MEMBRANE |
| PFREUD_04610 | gnuT       | Gluconate permease (transmembrane)                                               | PPA0738 | MEMBRANE |
| PFREUD_05020 | czcD       | Co/Zn/Cd cation transporter CzcD                                                 | PPA1951 | MEMBRANE |
| PFREUD_05080 | menA       | 1,4-dihydroxy-2-naphthoateoctaprenyltransferase                                  | PPA1945 | MEMBRANE |
| PFREUD_05120 |            | Hypothetical membrane protein                                                    | PPA1941 | MEMBRANE |
| PFREUD_05160 | nuoA       | NADH-quinone oxidoreductase chain                                                | PPA1936 | MEMBRANE |
| PFREUD_05230 | nuoH       | NADH-quinone oxidoreductase subunit H (NADH dehydrogenase I subunit H)           | PPA1929 | MEMBRANE |
| PFREUD_05250 | nuoJ       | NADH-quinone oxidoreductase chain J (NADH dehydrogenase I, chain J)              | PPA1926 | MEMBRANE |
| PFREUD_05260 | nuoK       | NADH dehydrogenase I chain K                                                     | PPA1925 | MEMBRANE |
| PFREUD_05270 | nuoL       | NADH dehydrogenase (quinone)                                                     | PPA1924 | MEMBRANE |
| PFREUD_05280 | nuoM       | NADH dehydrogenase I chain M                                                     | PPA1923 | MEMBRANE |
| PFREUD_05290 | nuoN       | NADH dehydrogenase I chain N                                                     | PPA1922 | MEMBRANE |
| PFREUD_05360 |            | Hypothetical membrane protein                                                    | PPA1900 | MEMBRANE |
| PFREUD_05950 | oppC       | ABC transporter, permease protein OppC                                           | PPA2065 | MEMBRANE |
| PFREUD_05970 | secY       | Preprotein translocase SecY subunit                                              | PPA1835 | MEMBRANE |
| PFREUD_06130 |            | ABC transporter                                                                  | PPA1816 | MEMBRANE |
| PFREUD_06140 | pf2694     | ABC-type transporter, permease components                                        | PPA1814 | MEMBRANE |
| PFREUD_06160 |            | ABC transporter-associated permease                                              | PPA1812 | MEMBRANE |
| PFREUD_06710 | pspC       | Possible stress-response transcriptional regulator protein PspC                  | PPA1763 | MEMBRANE |
| PFREUD_06740 |            | Hypothetical protein                                                             | PPA1762 | MEMBRANE |
| PFREUD_07180 |            | Hypothetical protein                                                             | PPA0667 | MEMBRANE |
| PFREUD_07310 | purE       | Phosphoribosylaminoimidazole carboxylase catalytic subunit                       | PPA1701 | MEMBRANE |
| PFREUD_07430 |            | Cation transport protein                                                         | PPA1687 | MEMBRANE |
| PFREUD_07900 |            | Membrane protein                                                                 | PPA1641 | MEMBRANE |

|              |             |                                                                                                     |         |          |
|--------------|-------------|-----------------------------------------------------------------------------------------------------|---------|----------|
| PFREUD_07920 |             | Hypothetical membrane protein                                                                       | PPA1640 | MEMBRANE |
| PFREUD_07940 | PPA1638     | Putative ABC transporter                                                                            | PPA1638 | MEMBRANE |
| PFREUD_08220 |             | Hypothetical membrane protein                                                                       | PPA1574 | MEMBRANE |
| PFREUD_08860 |             | Hypothetical secreted protein                                                                       | PPA0938 | MEMBRANE |
| PFREUD_09240 | sdhC1       | Succinate dehydrogenase subunit C                                                                   | PPA0950 | MEMBRANE |
| PFREUD_09290 |             | ABC-type transport system, permease component                                                       | PPA0956 | MEMBRANE |
| PFREUD_09510 |             | Amino acid permease. Membran protein                                                                | PPA0969 | MEMBRANE |
| PFREUD_10050 |             | Permease protein of oligopeptide ABC transporter                                                    | PPA1275 | MEMBRANE |
| PFREUD_10270 |             | Hypothetical protein                                                                                | PPA1260 | MEMBRANE |
| PFREUD_10390 | tagO        | Undecaprenyl-phosphate alpha-N- acetylglucosaminyltransferase                                       | PPA1248 | MEMBRANE |
| PFREUD_10430 | atpB        | ATP synthase A chain ( ATPase protein 6) (F1F0- ATPase subunit a )                                  | PPA1245 | MEMBRANE |
| PFREUD_10440 | atpE        | ATP synthase C chain (F1F0-ATPase subunit c )                                                       | PPA1244 | MEMBRANE |
| PFREUD_10450 | atpF        | ATP synthase B chain (F0F1 ATP synthase subunit B)                                                  | PPA1243 | MEMBRANE |
| PFREUD_10510 |             | Hypothetical secreted protein                                                                       | PPA1237 | MEMBRANE |
| PFREUD_10730 |             | Hypothetical membrane anchored protein                                                              | PPA1119 | MEMBRANE |
| PFREUD_11200 |             | Permeases of the drug/metabolite transporter (DMT) superfamily                                      | PPA0923 | MEMBRANE |
| PFREUD_11670 | secF        | Protein-export membrane protein secF                                                                | PPA1163 | MEMBRANE |
| PFREUD_11870 | lgt         | Prolipoprotein diacylglyceryl transferase                                                           | PPA1133 | MEMBRANE |
| PFREUD_12240 | cobS        | Cobalamin 5 -phosphate synthase (adenosylcobinamide-GDP ribazoletransferase)                        | PPA0442 | MEMBRANE |
| PFREUD_12370 |             | Small basic protein (membrane)                                                                      | PPA1081 | MEMBRANE |
| PFREUD_12390 | pgs1        | CDP-diacylglycerol--glycerol-3-phosphate 3- phosphatidyl- transferase                               | PPA1079 | MEMBRANE |
| PFREUD_12420 | pgs2        | CDP-diacylglycerol--glycerol-3-phosphate 3- phosphatidyl-transferase                                | PPA1078 | MEMBRANE |
| PFREUD_13190 |             | Phosphatidylglycerophosphate synthase                                                               | PPA1007 | MEMBRANE |
| PFREUD_13320 |             | Membrane protease                                                                                   | PPA1365 | MEMBRANE |
| PFREUD_13510 | tatC        | Sec-independent protein translocase protein TatC homolog                                            | PPA1378 | MEMBRANE |
| PFREUD_13690 |             | Cobalt permease                                                                                     | PPA1398 | MEMBRANE |
| PFREUD_13720 |             | BioY family protein. Membrane protein                                                               | PPA1400 | MEMBRANE |
| PFREUD_14090 |             | Hypothetical protein                                                                                | PPA1416 | MEMBRANE |
| PFREUD_14200 | uppP (BacA) | Undecaprenyl-diphosphatase (Undecaprenyl pyrophosphate phosphatase) (Bacitracin resistance protein) | PPA2224 | MEMBRANE |
| PFREUD_14320 | sdhC2       | Succinate dehydrogenase cytochrome B-558 subunit                                                    | PPA1439 | MEMBRANE |
| PFREUD_14430 |             | Hypothetical membrane protein                                                                       | PPA1448 | MEMBRANE |
| PFREUD_14610 | glpF        | Glycerol uptake facilitator protein,                                                                | PPA2305 | MEMBRANE |
| PFREUD_14740 | cdsA        | Phosphatidate cytidylyltransferase                                                                  | PPA1517 | MEMBRANE |
| PFREUD_14830 |             | Transporter, sodium/bile acid symporter family                                                      | PPA1527 | MEMBRANE |
| PFREUD_15290 | terC        | Membrane protein TerC                                                                               | PPA0804 | MEMBRANE |
| PFREUD_15440 |             | Hypothetical protein                                                                                | PPA0764 | MEMBRANE |
| PFREUD_15510 | ftsW1       | Cell division protein FtsW                                                                          | PPA0757 | MEMBRANE |
| PFREUD_15530 | mraY        | Phospho- N-acetylmuramoyl-pentapeptide- transferase (UDP- MurNac-pentapeptide phosphotransferase)   | PPA0755 | MEMBRANE |
| PFREUD_15700 |             | Hypothetical transmembrane protein                                                                  | PPA0728 | MEMBRANE |
| PFREUD_15810 |             | Hypothetical protein                                                                                | PPA0715 | MEMBRANE |
| PFREUD_15950 |             | Hypothetical protein                                                                                | PPA0683 | MEMBRANE |
| PFREUD_16130 |             | Hypothetical protein                                                                                | PPA0646 | MEMBRANE |
| PFREUD_16220 |             | Chloride channel                                                                                    | PPA2253 | MEMBRANE |
| PFREUD_16340 | dcuA        | C4-dicarboxylate transporter                                                                        | PPA0095 | MEMBRANE |
| PFREUD_16350 | pimH        | Integral membrane efflux protein                                                                    | PPA1946 | MEMBRANE |
| PFREUD_16500 | cstA        | Carbon starvation protein                                                                           | PPA0660 | MEMBRANE |
| PFREUD_17000 |             | Hypothetical membrane protein                                                                       | PPA0565 | MEMBRANE |
| PFREUD_17210 |             | Hypothetical membrane protein                                                                       | PPA0549 | MEMBRANE |
| PFREUD_17510 |             | dolichyl-phosphate-mannose-protein mannosyltransferase (Glycosyl transferase, family 39)            | PPA0523 | MEMBRANE |
| PFREUD_17530 | rutG        | Pyrimidine permease RutG (Pyrimidine utilization protein G)                                         | PPA0522 | MEMBRANE |
| PFREUD_17580 |             | Hypothetical membrane protein                                                                       | PPA0770 | MEMBRANE |
| PFREUD_17590 |             | Hypothetical protein                                                                                | PPA0771 | MEMBRANE |
| PFREUD_17660 | proP        | Proline/betaine transporter                                                                         | PPA0634 | MEMBRANE |
| PFREUD_17670 |             | Permease                                                                                            | PPA0285 | MEMBRANE |
| PFREUD_17980 |             | Hypothetical membrane protein                                                                       | PPA0496 | MEMBRANE |
| PFREUD_18180 |             | permease                                                                                            | PPA0480 | MEMBRANE |
| PFREUD_18660 | lldP        | L-lactate permease                                                                                  | PPA0166 | MEMBRANE |
| PFREUD_18720 |             | Amino acid permease. membrane protein                                                               | PPA0368 | MEMBRANE |
| PFREUD_19180 | dedD        | Conserved membrane protein (DedA family)                                                            | PPA2014 | MEMBRANE |
| PFREUD_19240 |             | Oligopeptide transporter, OPT family protein.                                                       | PPA0554 | MEMBRANE |
| PFREUD_19320 |             | Hypothetical membrane protein                                                                       | PPA0931 | MEMBRANE |
| PFREUD_19570 |             | Forkhead-associated protein                                                                         | PPA0188 | MEMBRANE |
| PFREUD_19590 | ftsW2       | Cell division protein                                                                               | PPA0186 | MEMBRANE |
| PFREUD_19650 | feoB        | Ferrous iron transport protein B                                                                    | PPA1677 | MEMBRANE |
| PFREUD_19680 |             | Na <sup>+</sup> /H <sup>+</sup> antiporter                                                          | PPA2179 | MEMBRANE |
| PFREUD_20120 |             | Hypothetical membrane protein                                                                       | PPA0317 | MEMBRANE |
| PFREUD_20180 |             | ABC transporter                                                                                     | PPA0156 | MEMBRANE |
| PFREUD_20400 | corA        | CorA, Mg <sup>2+</sup> and Co <sup>2+</sup> transporters                                            | PPA1716 | MEMBRANE |
| PFREUD_20460 | cycA1       | D-serine/D-alanine/glycine transporter                                                              | PPA1643 | MEMBRANE |
| PFREUD_20590 | dmsC        | Anaerobic dimethyl sulfoxide reductase chain C                                                      | PPA0515 | MEMBRANE |
| PFREUD_20700 |             | Hypothetical membrane protein                                                                       | PPA0231 | MEMBRANE |
| PFREUD_20740 | NhaA        | sodium:proton antiporter                                                                            | PPA0227 | MEMBRANE |
| PFREUD_20780 |             | Cation-transporting ATPase                                                                          | PPA2240 | MEMBRANE |
| PFREUD_20910 | slgT        | Na <sup>+</sup> /galactose cotransporter / Sodium/glucose cotransporter                             | PPA2193 | MEMBRANE |
| PFREUD_20950 | mntH        | Mn <sup>2+</sup> and Fe <sup>2+</sup> transporter                                                   | PPA2026 | MEMBRANE |
| PFREUD_21530 | pntB        | NADH dehydrogenase                                                                                  | PPA0626 | MEMBRANE |
| PFREUD_21540 | pntA        | NAD(P)(+) transhydrogenase (AB-specific).                                                           | PPA0625 | MEMBRANE |
| PFREUD_22020 |             | Major facilitator super family MSF1                                                                 | PPA0048 | MEMBRANE |
| PFREUD_22420 |             | Hypothetical membrane protein                                                                       | PPA2323 | MEMBRANE |
| PFREUD_22800 | kup         | Potassium transport system protein                                                                  | PPA2187 | MEMBRANE |
| PFREUD_23170 |             | Membrane protein, Transporter, MFS superfamily                                                      | PPA1837 | MEMBRANE |
| PFREUD_23310 | proW        | ABC-type glycine betaine transport protein                                                          | PPA0406 | MEMBRANE |
| PFREUD_23320 | proZ        | PROZ-like protein (ABC-type glycine betaine transport, permease protein)                            | PPA0405 | MEMBRANE |
| PFREUD_23400 |             | Binding-protein-dependent transport systems inner membrane component                                | PPA0399 | MEMBRANE |
| PFREUD_23410 |             | Binding-protein-dependent transport systems inner membrane component                                | PPA0057 | MEMBRANE |
| PFREUD_23620 | pigV        | GPI mannosyltransferase 2                                                                           | PPA0128 | MEMBRANE |
| PFREUD_24010 | fepD        | iron ABC transporter, permease protein                                                              | PPA0657 | MEMBRANE |
| PFREUD_24190 | oxaA        | Conserved membrane protein                                                                          | PPA2350 | MEMBRANE |
| PFREUD_00180 |             | Hypothetical protein                                                                                | PPA1807 | PSE      |
| PFREUD_00350 |             | ABC transporter                                                                                     | PPA0099 | PSE      |
| PFREUD_00810 |             | Sensor protein, ATPase-like:Histidine kinase                                                        | PPA2113 | PSE      |
| PFREUD_00980 | norB        | Nitric-oxide reductase subunit B (nitric-oxide reductase)                                           | PPA1975 | PSE      |
| PFREUD_01090 | gltA2       | Citrate synthase                                                                                    | PPA1423 | PSE      |
| PFREUD_01490 |             | membrane protein without function                                                                   | PPA2195 | PSE      |

|              |          |                                                                 |         |          |
|--------------|----------|-----------------------------------------------------------------|---------|----------|
| PFREUD_01610 |          | ABC transporter permease                                        | PPA2031 | PSE      |
| PFREUD_01720 | cydA     | Cytochrome d ubiquinol oxidase subunit I                        | PPA0176 | PSE      |
| PFREUD_02090 |          | ABC transporter, transmembrane region                           | PPA0178 | PSE      |
| PFREUD_05510 | secE     | SecE/Sec61-gamma subunit of protein translocation complex       | PPA1892 | PSE      |
| PFREUD_05930 | bopA     | solute binding protein of the ABC transport system              | PPA1840 | PSE      |
| PFREUD_06630 | biaA     | ABC transport system component                                  | PPA0017 | PSE      |
| PFREUD_06790 |          | Phospholipase D/Transphosphatidylase                            | PPA1761 | PSE      |
| PFREUD_06900 |          | Hypothetical protein                                            | PPA1736 | PSE      |
| PFREUD_07360 |          | Glycosyltransferase                                             | PPA1693 | PSE      |
| PFREUD_07460 |          | Hypothetical protein                                            | PPA1684 | PSE      |
| PFREUD_08330 | dsbG     | DSBA oxidoreductase                                             | PPA1567 | PSE      |
| PFREUD_08340 |          | Hypothetical membrane protein                                   | PPA1566 | PSE      |
| PFREUD_08650 | comEC    | ComE operon protein 3                                           | PPA0895 | PSE      |
| PFREUD_09360 | chlD     | ChlD, Mg-chelatase subunit ChlD                                 | PPA0976 | PSE      |
| PFREUD_09370 |          | Von Willebrand factor, type A                                   | PPA0977 | PSE      |
| PFREUD_09430 | fabH     | 3-oxoacyl-(Acyl-carrier-protein) synthase III                   | PPA0983 | PSE      |
| PFREUD_09600 | ftsX     | Cell division protein                                           | PPA1352 | PSE      |
| PFREUD_09640 |          | Hypothetical transmembrane protein                              | PPA1344 | PSE      |
| PFREUD_09940 |          | Secreted protease with a PDZ domain                             | PPA1310 | PSE      |
| PFREUD_10030 |          | ABC transporter, substrate binding protein                      | PPA1277 | PSE      |
| PFREUD_10040 |          | ABC transporter permease protein                                | PPA1276 | PSE      |
| PFREUD_10970 |          | Hypothetical protein                                            | PPA1221 | PSE      |
| PFREUD_11540 |          | Aminodeoxychorismate lyase                                      | PPA1180 | PSE      |
| PFREUD_11680 | secD     | Protein-export membrane protein secD                            | PPA1162 | PSE      |
| PFREUD_12270 |          | transporter                                                     | PPA1203 | PSE      |
| PFREUD_12360 |          | Hypothetical protein                                            | PPA1082 | PSE      |
| PFREUD_12380 |          | Hypothetical protein                                            | PPA1080 | PSE      |
| PFREUD_12690 | ydaO     | Amino acid permease                                             | PPA1059 | PSE      |
| PFREUD_13110 |          | Metal dependent phosphohydrolase                                | PPA1014 | PSE      |
| PFREUD_13210 | ftsK     | DNA translocase FtsK                                            | PPA1356 | PSE      |
| PFREUD_14120 |          | FtsH                                                            | PPA0260 | PSE      |
| PFREUD_14280 | lepB     | Signal peptidase I                                              | PPA1434 | PSE      |
| PFREUD_14310 | sdhA3    | Succinate dehydrogenase flavoprotein subunit                    | PPA1438 | PSE      |
| PFREUD_14550 |          | Hypothetical protein                                            | PPA1469 | PSE      |
| PFREUD_14680 |          | Hypothetical protein                                            | PPA1496 | PSE      |
| PFREUD_15410 | lspA     | Lipoprotein signal peptidase, signal peptidase II               | PPA0767 | PSE      |
| PFREUD_15480 | ftsQ     | Cell division protein FtsQ                                      | PPA0760 | PSE      |
| PFREUD_15780 |          | Hypothetical protein                                            | PPA0717 | PSE      |
| PFREUD_16040 |          | Hypothetical protein                                            | PPA0663 | PSE      |
| PFREUD_16450 |          | ABC transporter glycine betaine ?                               | PPA0404 | PSE      |
| PFREUD_16480 |          | major facilitator superfamily                                   | PPA1726 | PSE      |
| PFREUD_18030 |          | Hypothetical protein                                            | PPA0492 | PSE      |
| PFREUD_18790 | senX     | Sensor-like histidine kinase                                    | PPA0360 | PSE      |
| PFREUD_19390 |          | Metallophosphoesterase                                          | PPA2150 | PSE      |
| PFREUD_19400 | ponA     | Penicillin-binding protein (Transglycosylase/transpeptidase)    | PPA2149 | PSE      |
| PFREUD_19580 | pf456    | Hypothetical protein                                            | PPA0187 | PSE      |
| PFREUD_19610 | pknB     | Serine/threonine protein kinase                                 | PPA0184 | PSE      |
| PFREUD_19960 | pstC     | ABC transporter, permease protein                               | PPA0340 | PSE      |
| PFREUD_20650 |          | Hypothetical protein                                            | PPA0235 | PSE      |
| PFREUD_21970 |          | two component sensor kinase                                     | PPA0068 | PSE      |
| PFREUD_22080 |          | Hypothetical membrane protein                                   | PPA0043 | PSE      |
| PFREUD_22490 |          | Membrane permease (sugar transporter)                           | PPA0295 | PSE      |
| PFREUD_23610 |          | Alpha-amylase                                                   | PPA0592 | PSE      |
| PFREUD_23640 | mrc/ponA | penicillin-binding protein ( peptidoglycan glycosyltransferase) | PPA0126 | PSE      |
| PFREUD_23840 |          | Chloride channel protein                                        | PPA0080 | PSE      |
| PFREUD_24060 |          | Hypothetical protein                                            | PPA2302 | PSE      |
| PFREUD_02530 |          | Hypothetical secreted protein                                   | PPA2130 | SECRETED |
| PFREUD_02660 |          | Metallophosphoesterase                                          | PPA1498 | SECRETED |
| PFREUD_03070 |          | Hypothetical protein                                            | PPA0444 | SECRETED |
| PFREUD_06750 | feuS     | iron ABC transport system, solute-binding protein precursor     | PPA0334 | SECRETED |
| PFREUD_09270 | dus      | TIM-barrel enzyme, dihydrouridine synthase                      | PPA0954 | SECRETED |
| PFREUD_12220 | cbiA     | Cobyric acid A,C-diamide synthase, CbiA                         | PPA0438 | SECRETED |
| PFREUD_14400 | ftsY     | Signal recognition particle receptor                            | PPA1447 | SECRETED |
| PFREUD_16260 |          | Hypothetical secreted protein                                   | PPA0629 | SECRETED |
| PFREUD_16950 | rmuC     | DNA recombination protein                                       | PPA0573 | SECRETED |
| PFREUD_17340 |          | Hypothetical protein                                            | PPA0542 | SECRETED |
| PFREUD_19470 | ptsI     | PTS enzyme I                                                    | PPA0351 | SECRETED |
| PFREUD_19600 | pbpA     | Penicillin-binding protein                                      | PPA0185 | SECRETED |
| PFREUD_22120 |          | Hypothetical membrane protein                                   | PPA0039 | SECRETED |
