# Supplementary material for: The Complete Genome of Propionibacterium freudenreichii CIRM-BIA1T, a Hardy Actinobacterium with Food and Probiotic Applications
Source: PLoS One. 2010 Jul 23;5(7):e11748. doi: 10.1371/journal.pone.0011748 (PMC2909200; doi:10.1371/journal.pone.0011748)
Supplement: Table S4 — Propionibacterium freudenreichii carbon substrate degradation. (0.03 MB PDF) [file pone.0011748.s004.pdf]

| Carbon substrates   | <i>P. freudenreichii</i> (1) | <i>P. freudenreichii</i> (2) | CIP103027 <sup>T</sup> |
|---------------------|------------------------------|------------------------------|------------------------|
| glucose             | +                            | +                            | +                      |
| galactose           | +                            | +                            | +                      |
| D-mannose           | +                            | +                            | +                      |
| D-fructose          | +                            | d+                           | +                      |
| lactose             | + or – (3)                   | d+                           | +                      |
| glycerol            | +                            | +                            | +                      |
| erythritol          | +                            | +                            | +                      |
| adonitol            | d+                           | +                            | +                      |
| Lactic acid         | +                            | +                            | +                      |
| Gluconic acid       | nr                           | d-                           | +                      |
| Esculine hydrolysis | +                            | +                            | -                      |
| inositol            | d+                           | +                            | -                      |
| L-arabinose         | +                            | d+                           | -                      |
| ribose              | d+                           | d-                           | -                      |
| melibiose           | -                            | d-                           | -                      |
| D-raffinose         | -                            | d-                           | +                      |
| Saccharose          | -                            | d-                           | -                      |
| L-arabitol          | nr                           | d-                           | -                      |
| Xylitol             | nr                           | d-                           | -                      |

+, positive reaction in 90-100% of strains; -, negative reaction in 90-100% of strains; d+, positive reaction in 40-90% of strains; d-, negative reaction in 40-100% of strains;

(1) Reference [35]

(2) This study: results of tests in Api 50CH strips for 150 *P. freudenreichii* strains

(3) Depending on the subspecies *freudenreichii* or *shermanii*

nr: not reported
